# Supplementary material for: Investigation of Ln3+ complexation by a DOTA derivative substituted by an imidazothiadiazole: synthesis, solution structure, luminescence and relaxation properties
Source: Royal Society of Chemistry journal article supplement (doi:10.1039/d4dt00533c), 2024-01-01
Supplement: d4dt00533c1.pdf [file d4dt00533c1.pdf]

## Investigation of Ln<sup>3+</sup> complexation by a DOTA derivative substituted by an imidazothiadiazole: synthesis, solution structure, luminescence and relaxation properties

Emma Caillet, Léa Nunes, Svetlana V. Eliseeva, Modou Ndiaye, Manon Isaac, Agnès Pallier, Jean-François Morfin, Hervé Meudal, Stéphane Petoud, Sylvain Routier, Carlos Platas-Iglesias, Frédéric Buron \* and Célia S. Bonnet \*

### Table of Contents

|                                                                             |       |
|-----------------------------------------------------------------------------|-------|
| 1. Copies of <sup>1</sup> H and <sup>13</sup> C spectra .....               | 2-6   |
| 2. UV, fluorescence and potentiometric data.....                            | 7-10  |
| 3. Kinetic measurements.....                                                | 11    |
| 4. NMR.....                                                                 | 12-14 |
| 5. DFT calculations.....                                                    | 15-28 |
| 6. Luminescence lifetime measurements.....                                  | 29    |
| 7. Relaxivity data.....                                                     | 29-30 |
| 8. Equations used for the fitting of the NMRD and <sup>17</sup> O data..... | 30-34 |

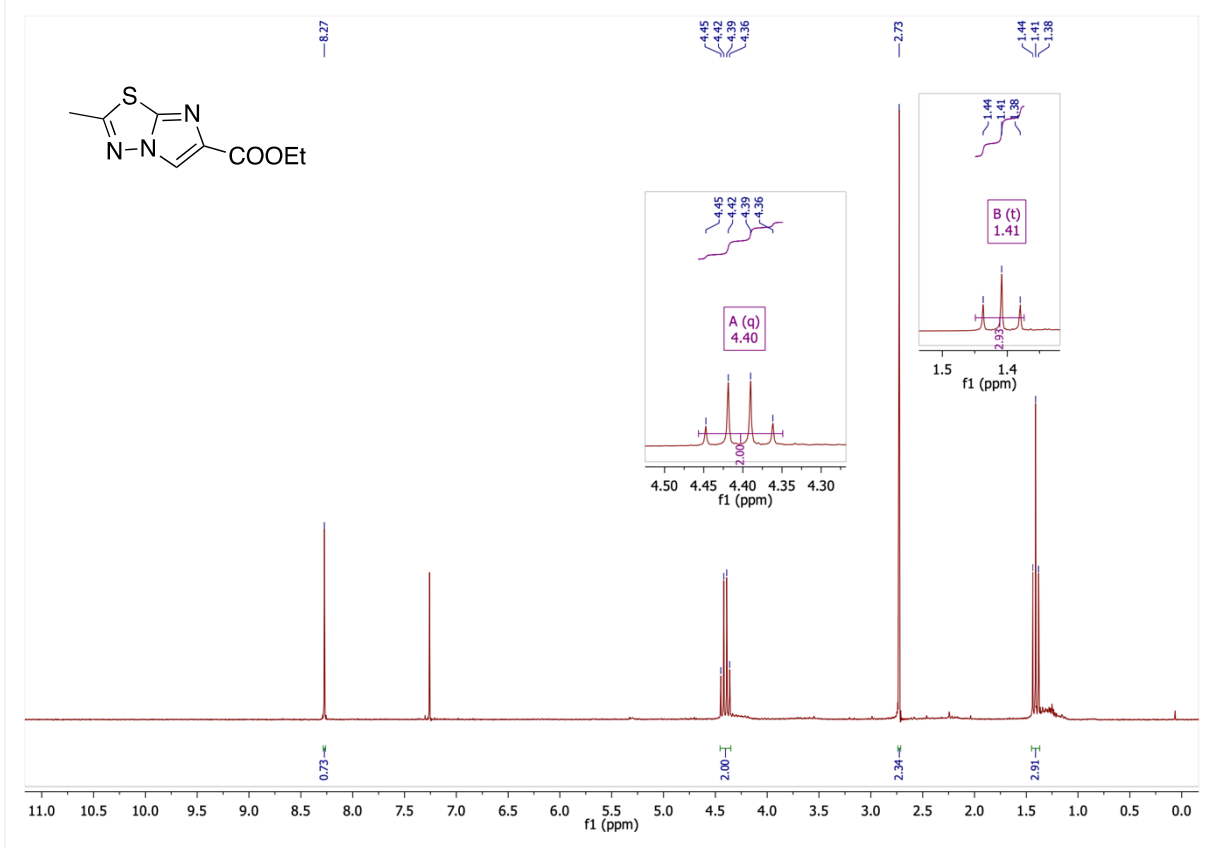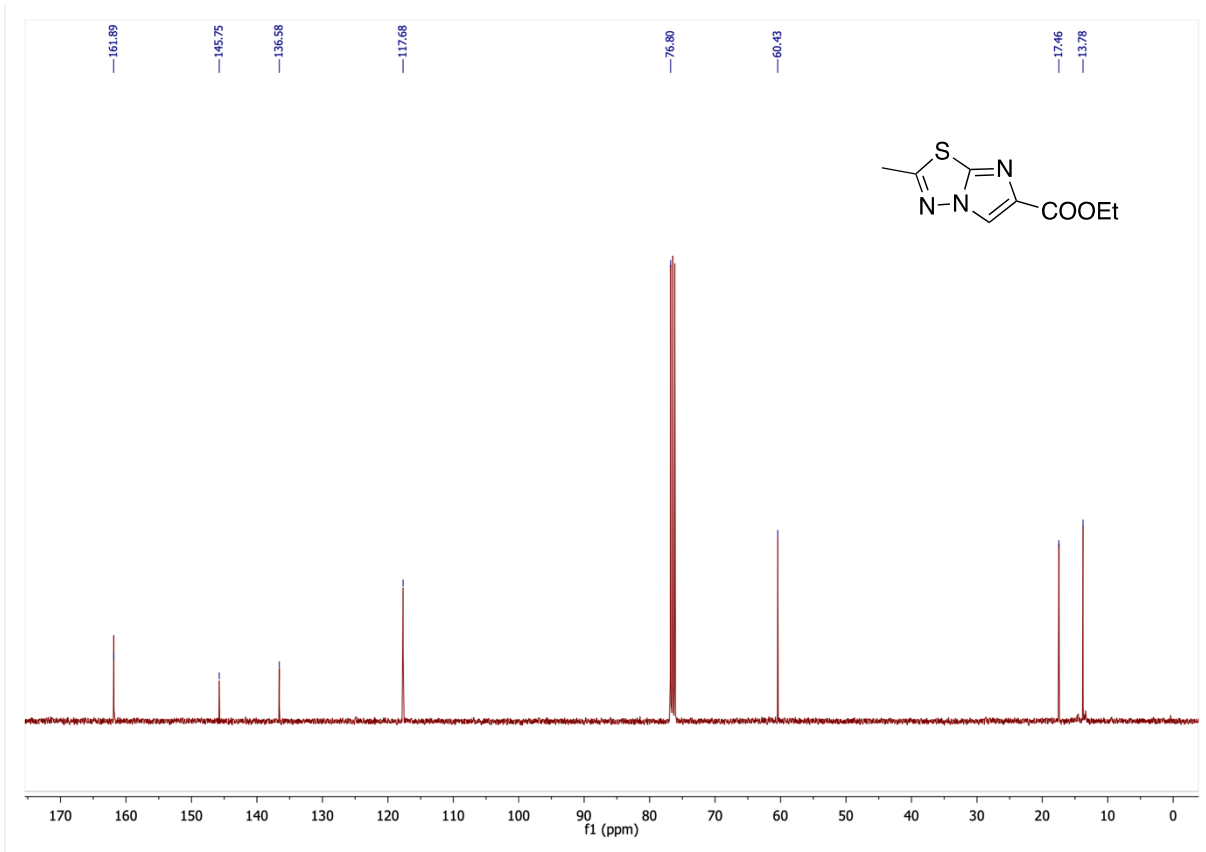

**Figure S1:**  $^1\text{H}$  and  $^{13}\text{C}$  NMR spectra of compound **2**

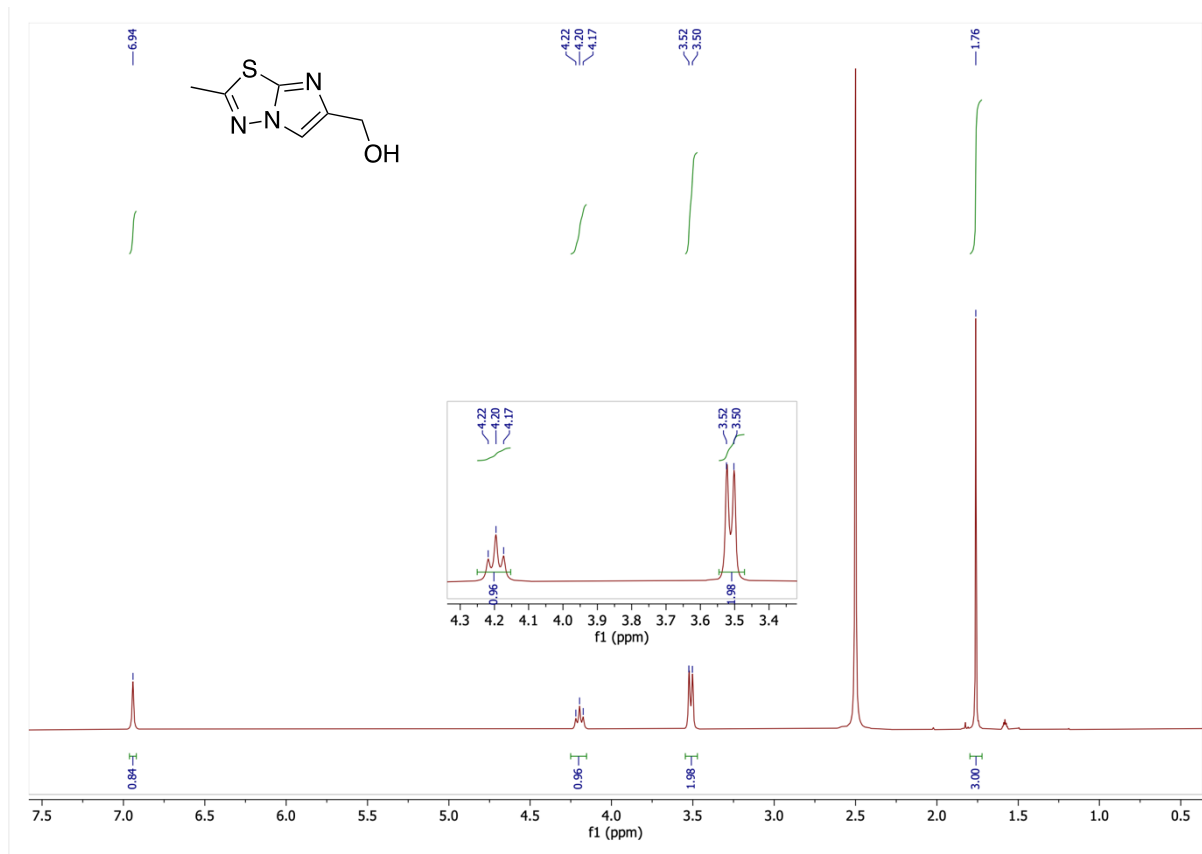

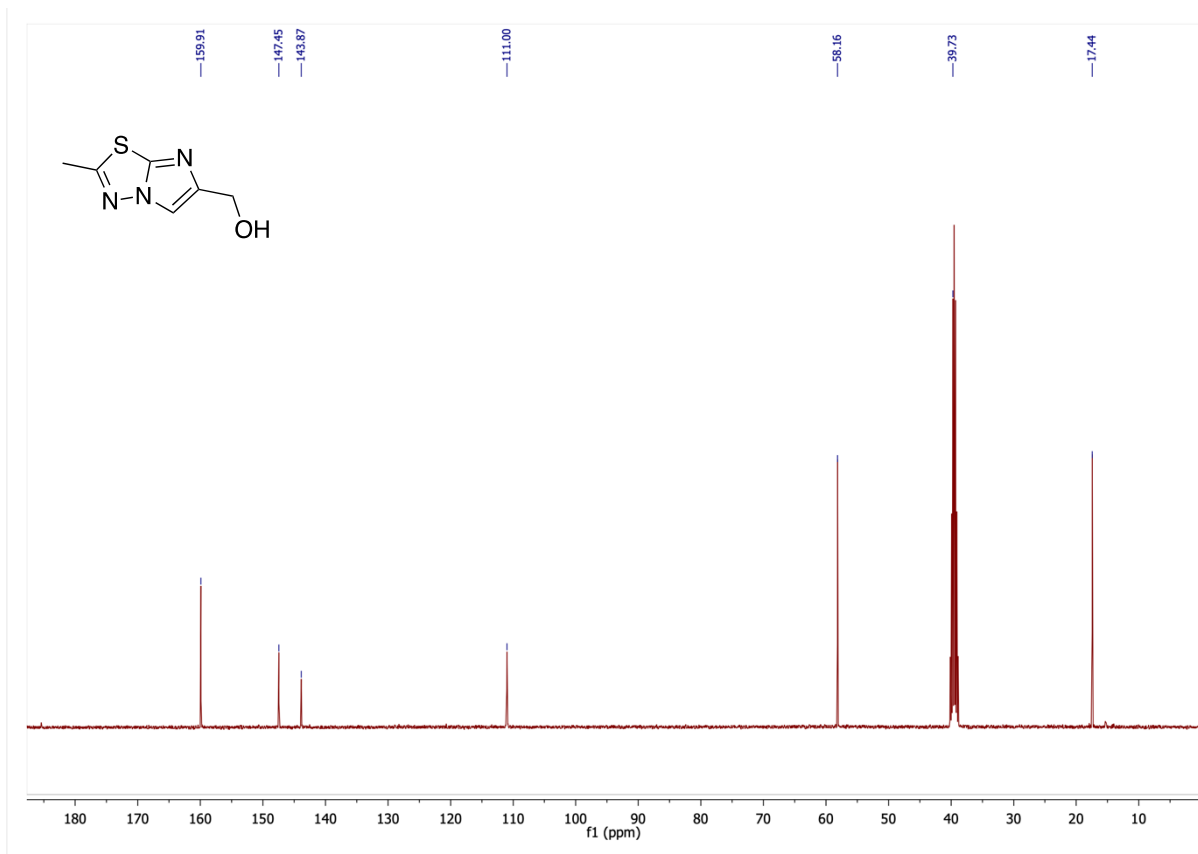

Figure S2:  $^1\text{H}$  and  $^{13}\text{C}$  NMR spectra of compound 3

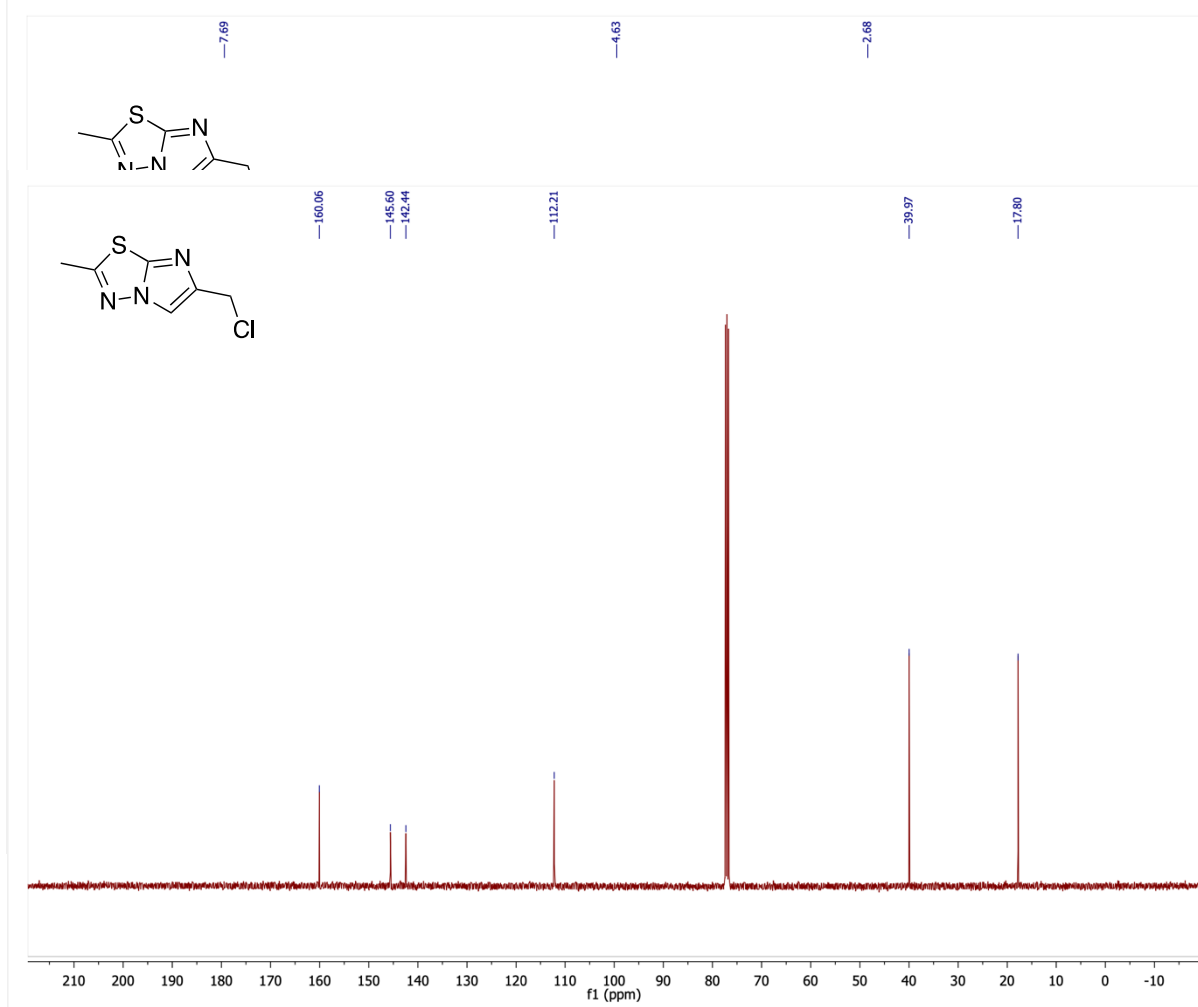

Figure S3:  $^1\text{H}$  and  $^{13}\text{C}$  NMR spectra of compound 4

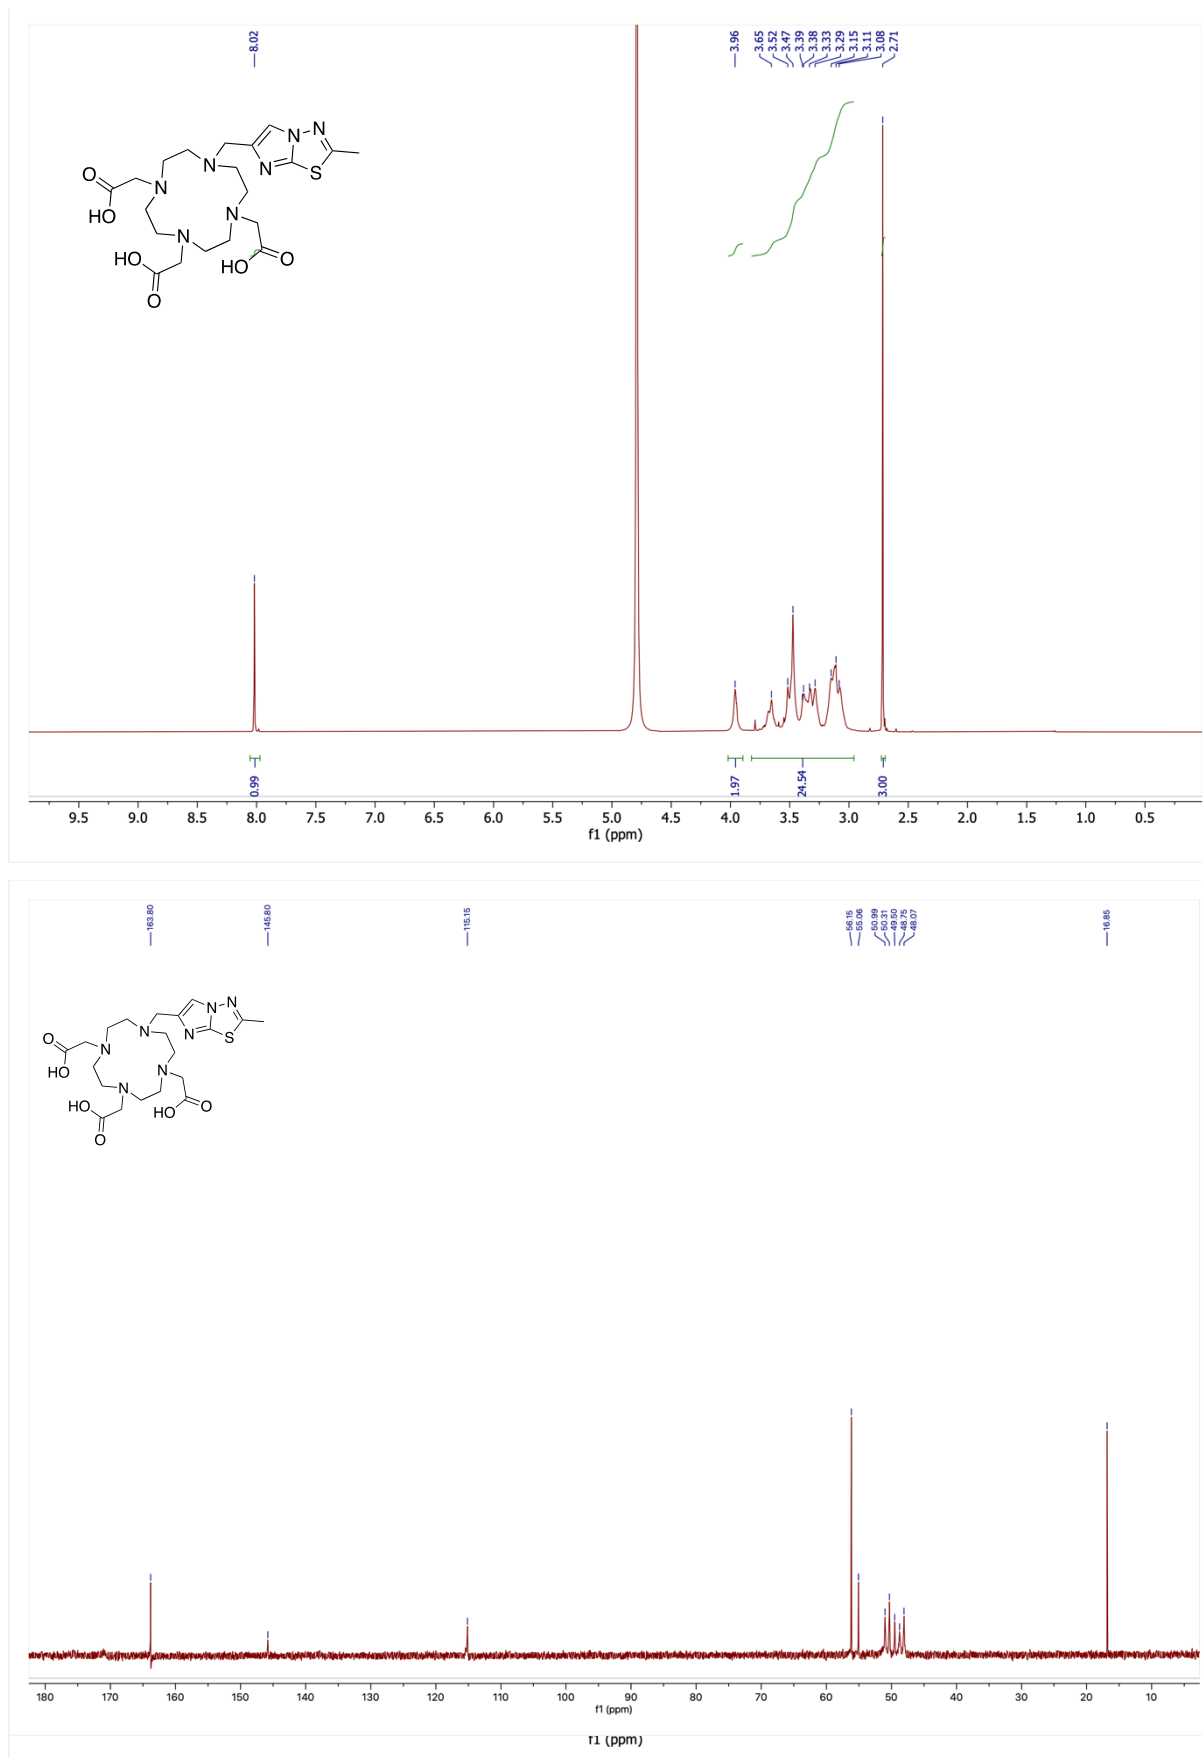

**Figure S4:**  $^1\text{H}$  and  $^{13}\text{C}$  NMR spectra of compound **L3**

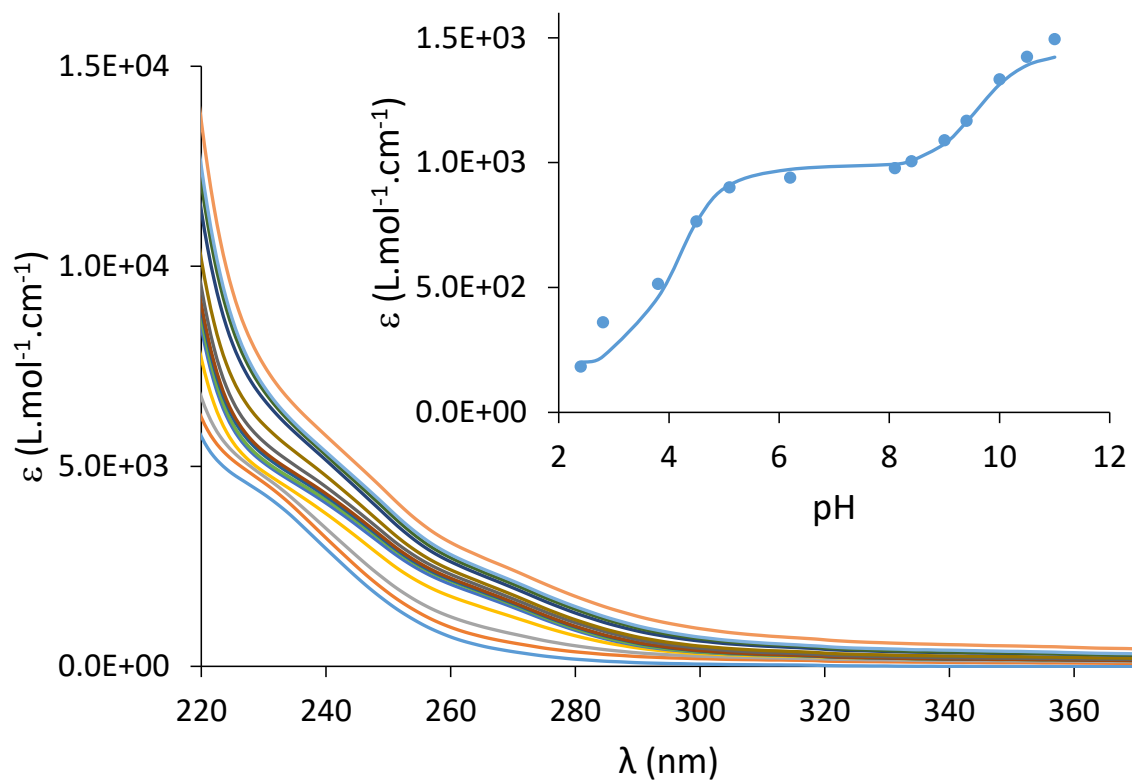

**Figure S5.** Absorption spectra of L3 (150 μM) in NaCl 0.15 M at 25°C ; inset : molar absorption coefficients at 280 nm as a function of pH (the line represents the best fit with the values presented in Table 2).

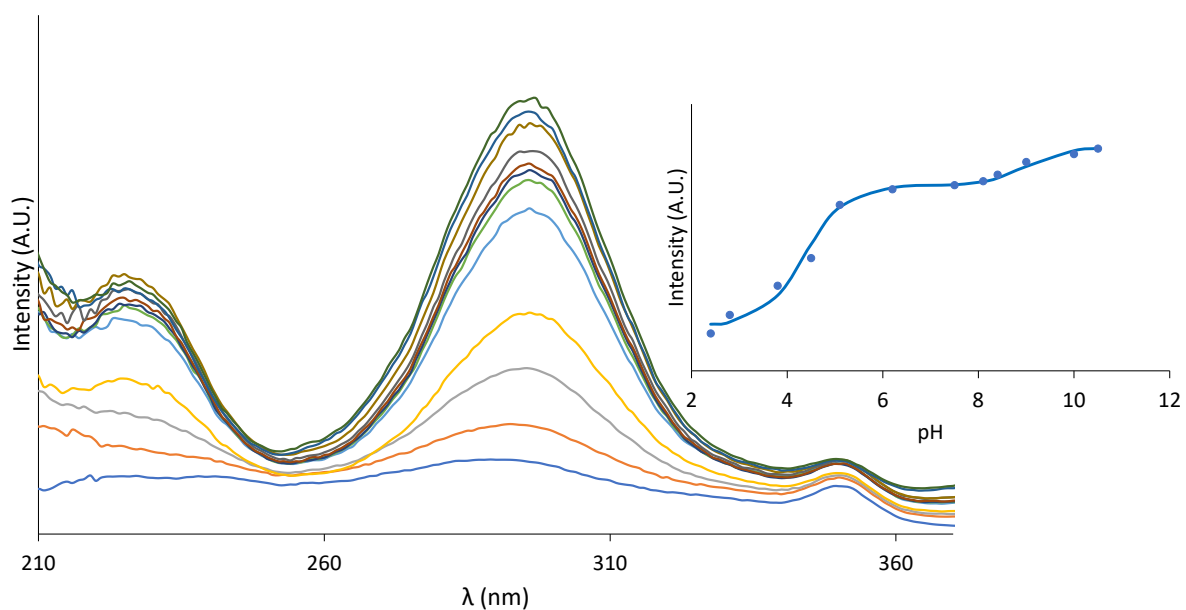

**Figure S6.** Normalized excitation spectra ( $\lambda_{em} = 400$  nm) of L3 (150  $\mu$ M) in NaCl 0.15 M at 25°C ; inset : Excitation intensities at 295 nm as a function of pH (the line represents the best fit with the values presented in Table 2).

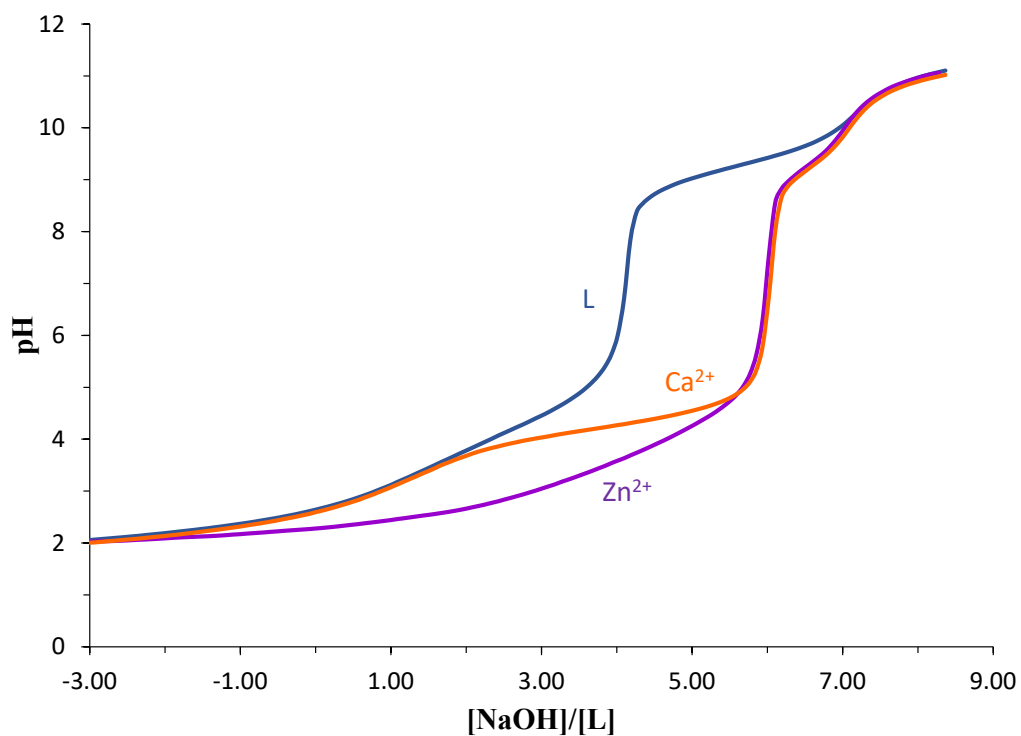

**Figure S7.** Potentiometric titrations of L3 (1.3 mM) in the absence and in the presence of 1 eq. of Zn<sup>2+</sup> and Ca<sup>2+</sup> in NaCl 0.15 M at 25°C

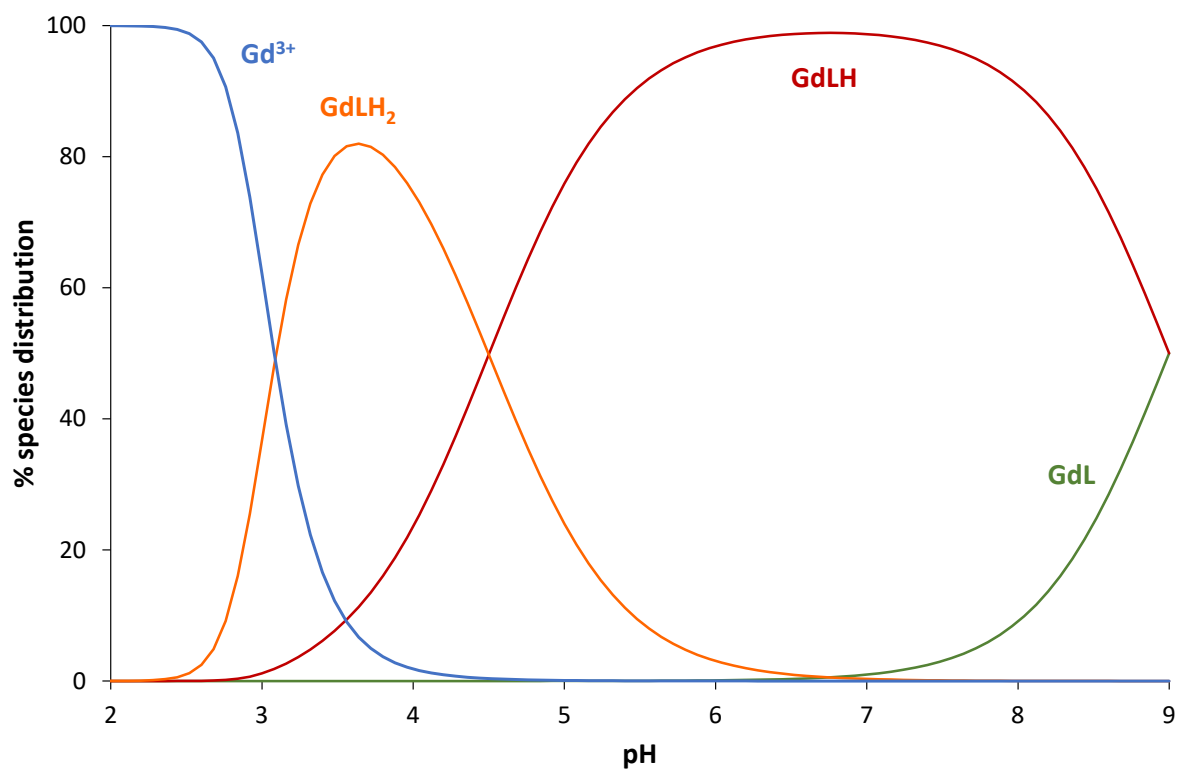

**Figure S8.** Speciation diagram of a Gd/L system in a 1/1 ratio with the Stability constants from Table 3.

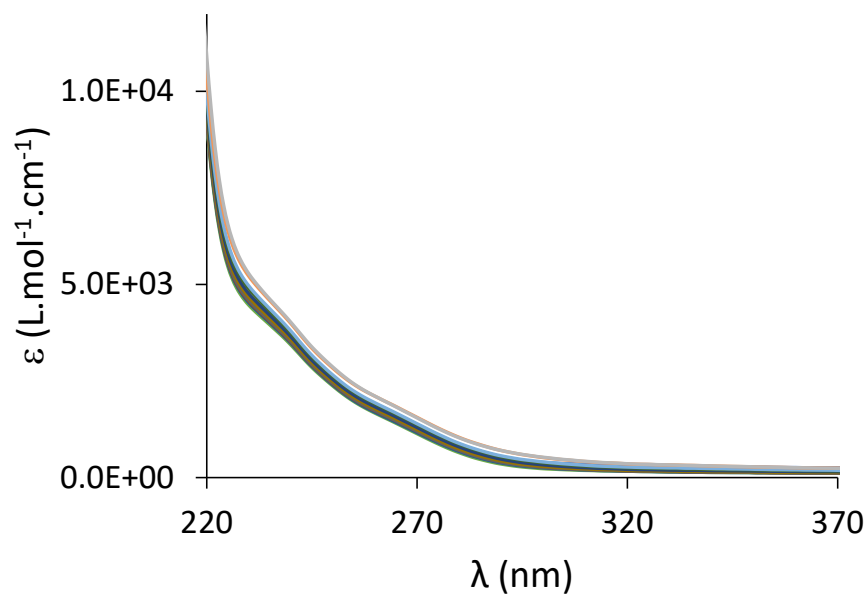

**Figure S9.** Absorption spectra of GdL3 (150  $\mu\text{M}$ ) in NaCl 0.15 M at 25°C at various pH ranging from 3 to 11.



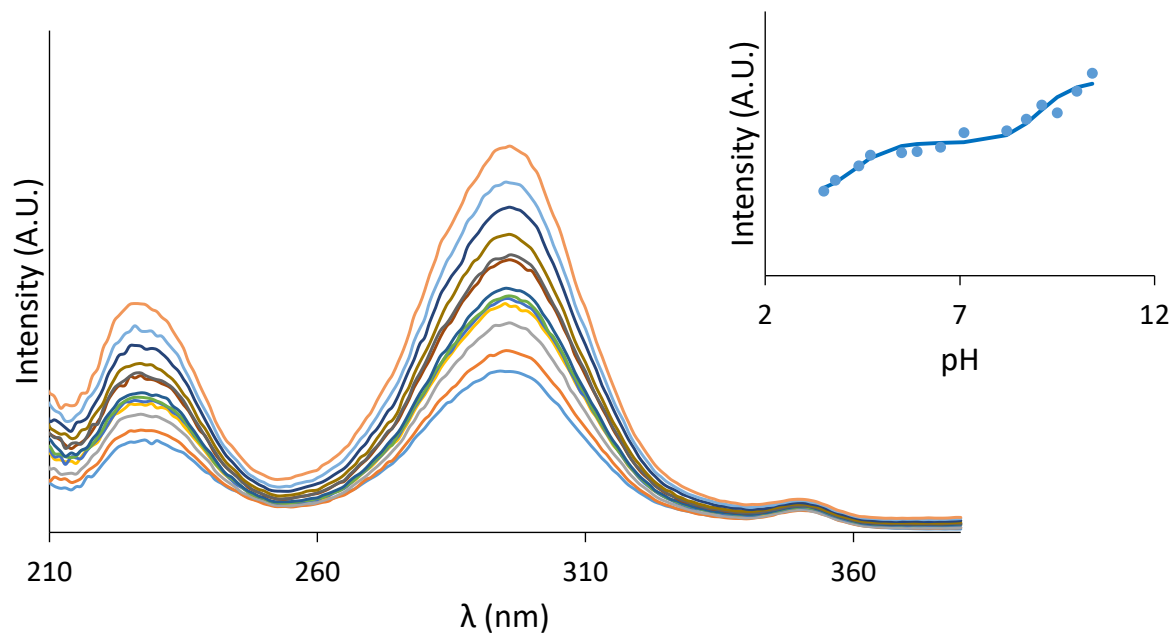

**Figure S10.** Normalized excitation spectra of GdL3 (150  $\mu\text{M}$ ) in NaCl 0.15 M at 25°C ( $\lambda_{\text{em}} = 400 \text{ nm}$ ) ; inset : Excitation intensities at 295 nm as a function of pH (the line represents the best fit with the values presented in Table 2).

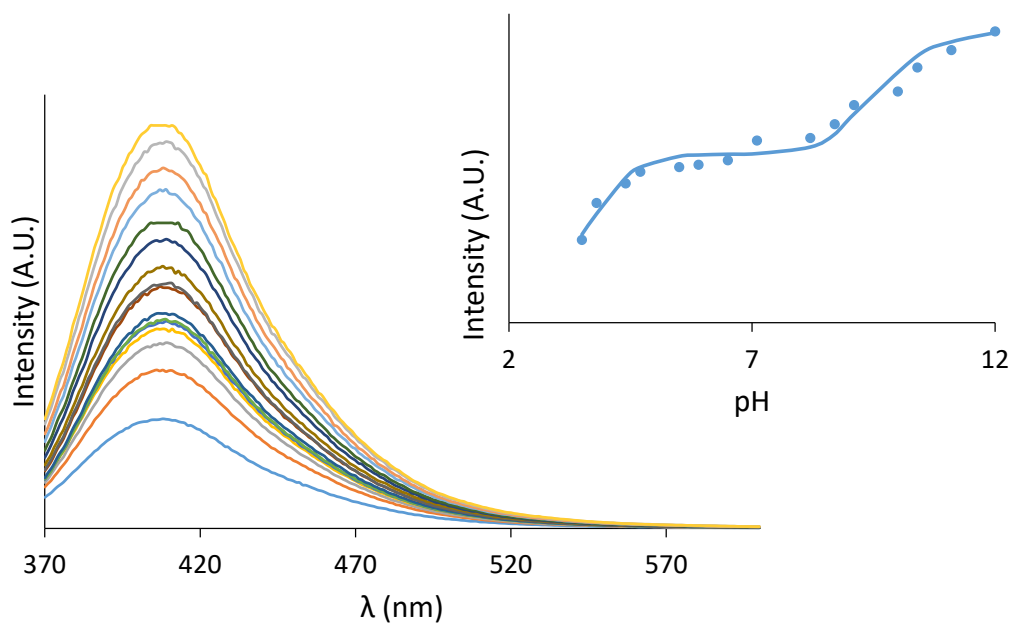

**Figure S11.** Normalized emission spectra of GdL3 (150  $\mu\text{M}$ ) in NaCl 0.15 M at 25°C ( $\lambda_{\text{exc}} = 300 \text{ nm}$ ); inset : Emission intensities at 400 nm as a function of pH (the line represents the best fit with the values presented in Table 2).

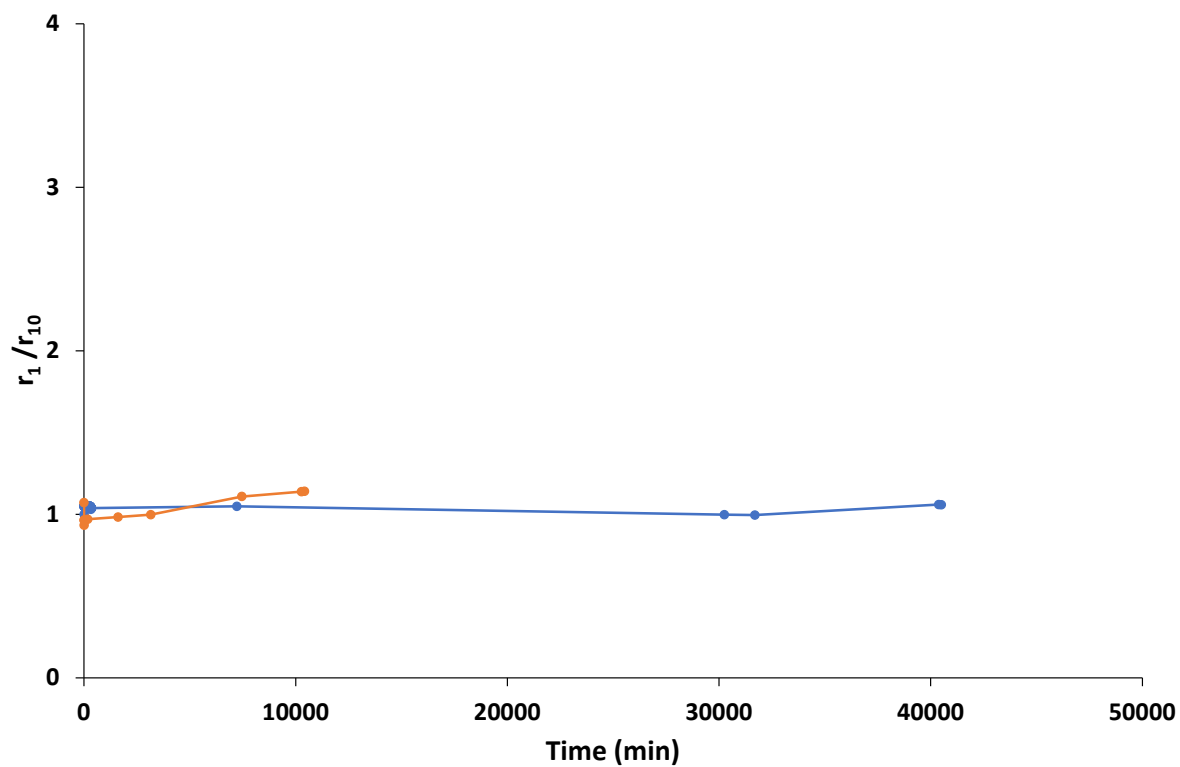

**Figure S12.** Normalized relaxivity at 60 MHz of a solution of GdL3H (0.4 mM) in NaCl 0.15 M at 25°C in the presence of 20 eq. of  $Zn^{2+}$  at pH 5 (●), or 10 eq. of  $Zn^{2+}$  at pH 2 (●).

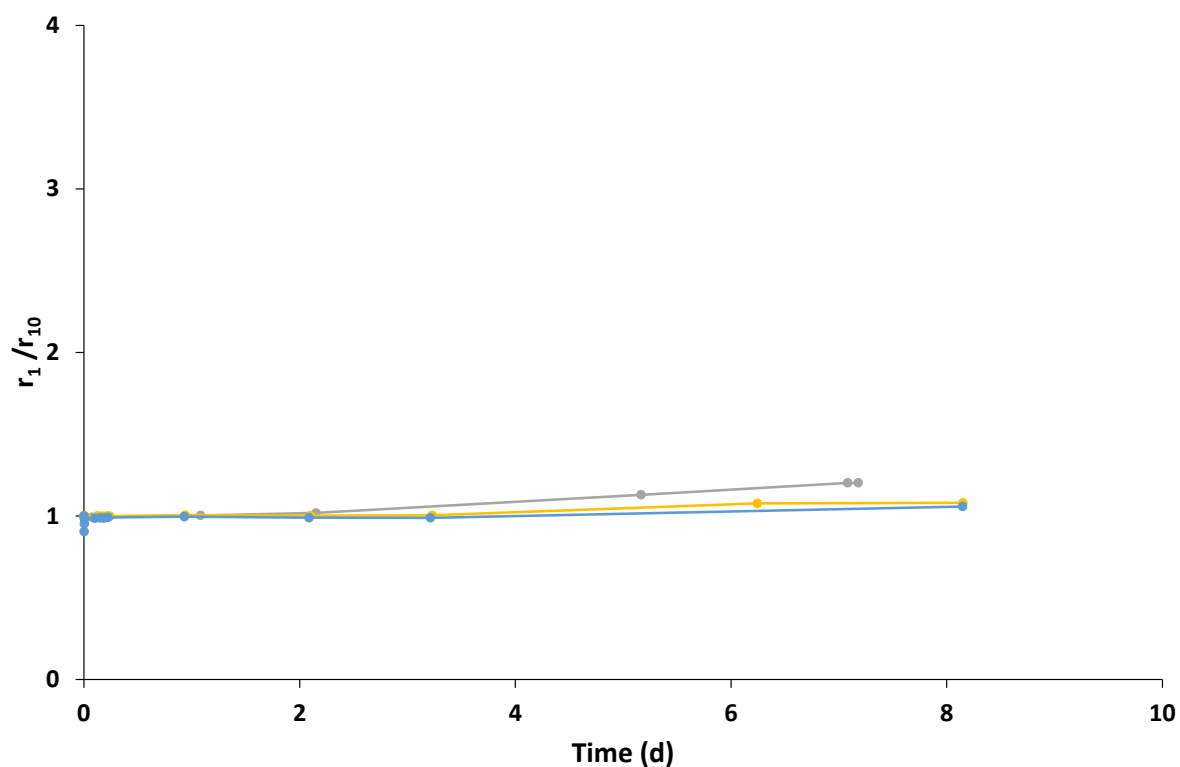

**Figure S13.** Normalized relaxivity at 60 MHz of a solution of GdL3H (0.4 mM) in NaCl 0.15 M at 25°C in the presence of 10 eq. of  $Eu^{3+}$  at pH 2 (●), pH 3 (●), or pH 5.5 (●).

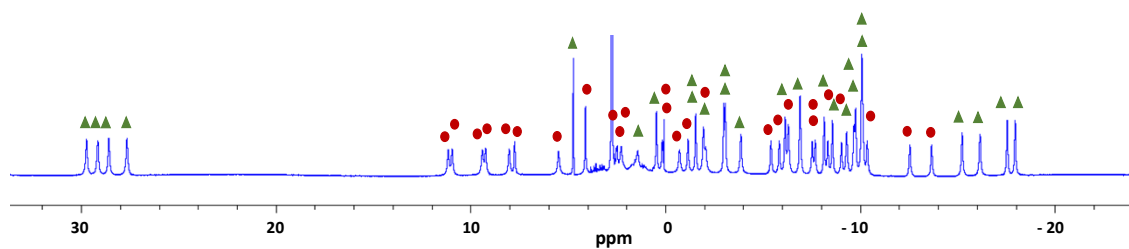

**Figure S14.**  $^1\text{H}$  NMR spectra (700 MHz) of EuL3H in D2O at pD 6.97, 298K.

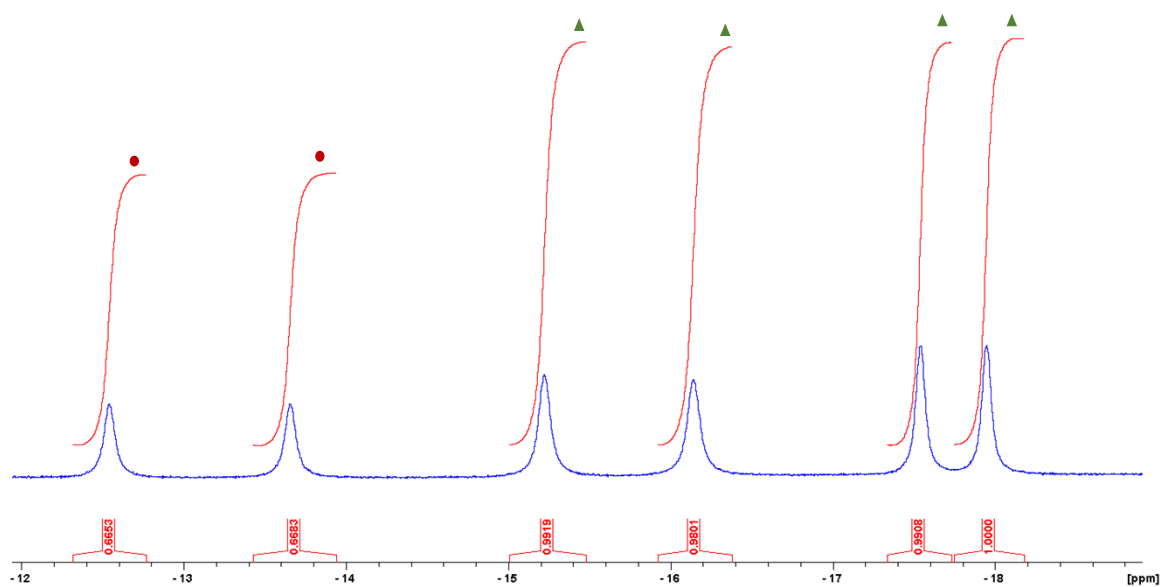

**Figure S15.** Partial  $^1\text{H}$  NMR spectra (700 MHz) of EuL3H 1.98 mM in D2O at pD 6.97, 298K.

## DFT calculations

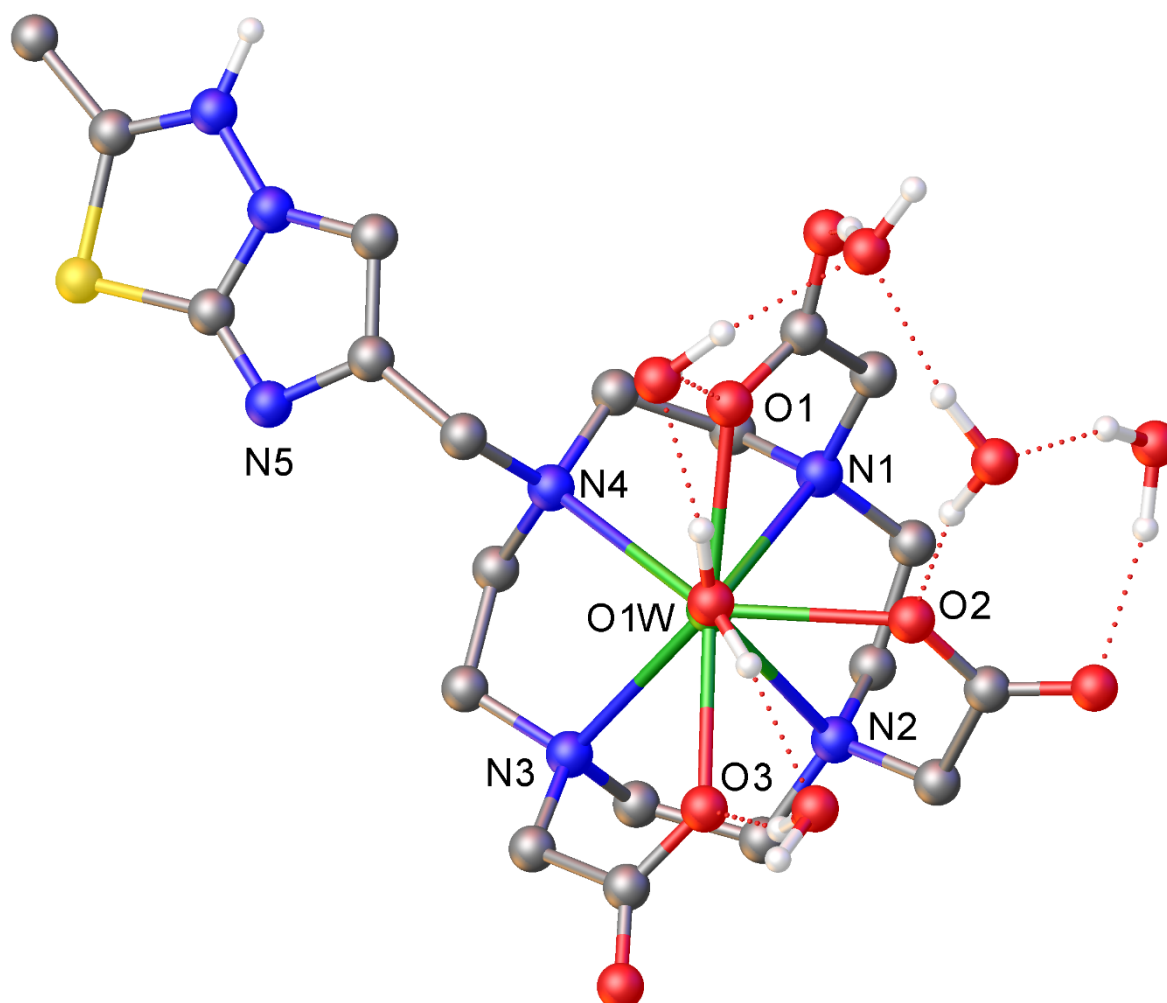

**Figure S16:** Geometry of the GdL3H-6H2O system ( $N_4O_4$  donor set) optimized using DFT calculations (wB97XD functional). Hydrogen atoms bonded to C atoms are omitted for simplicity. Bond distances of the Gd(III) coordination environment ( $\text{\AA}$ ): Gd-N1, 2.704; Gd-N2, 2.689; Gd-N3, 2.692; Gd-N4, 2.740; Gd-O1, 2.406; Gd-O2, 2.336; Gd-O3, 2.386; Gd-O1w, 2.449.

---

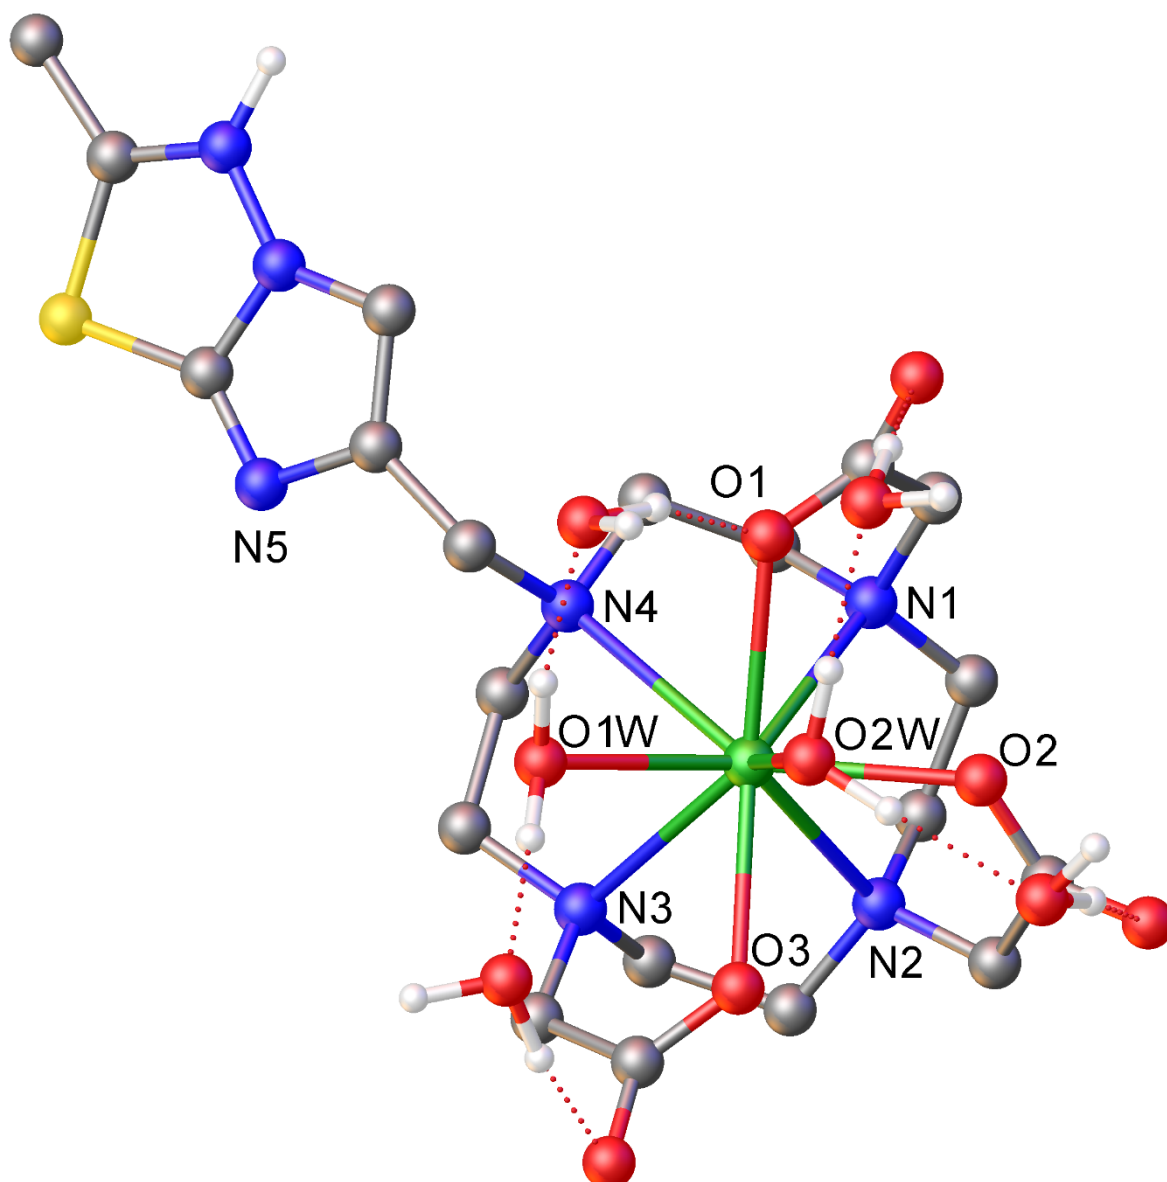

**Figure S17:** Geometry of the GdL3H·6H<sub>2</sub>O system (N<sub>4</sub>O<sub>5</sub> donor set) optimized using DFT calculations (wb97XD functional). Hydrogen atoms bonded to C atoms are omitted for simplicity. Bond distances of the Gd(III) coordination environment (Å): Gd-N1, 2.709; Gd-N2, 2.704; Gd-N3, 2.683; Gd-N4, 2.823; Gd-O1, 2.374; Gd-O2, 2.350; Gd-O3, 2.362; Gd-O1w, 2.514; Gd-O2w, 2.566.

---

**Table S1.** Cartesian coordinates (Å) obtained for the GdL3H-6H<sub>2</sub>O system (N<sub>5</sub>O<sub>4</sub> donor set) using DFT calculations (wB97XD functional, 0 imaginary frequencies).

| Center Number | Atomic Number | Coordinates (Angstroms) |           |           |
|---------------|---------------|-------------------------|-----------|-----------|
|               |               | X                       | Y         | Z         |
| 1             | 7             | 0.487750                | -2.172154 | -2.617153 |
| 2             | 6             | 1.589118                | -2.870594 | -1.922644 |
| 3             | 6             | 1.346694                | -3.062288 | -0.438619 |
| 4             | 7             | 1.219974                | -1.808239 | 0.327340  |
| 5             | 6             | 0.614134                | -2.085212 | 1.644297  |
| 6             | 6             | -0.884195               | -2.313487 | 1.573649  |
| 7             | 7             | -1.648291               | -1.184514 | 1.008579  |
| 8             | 6             | -2.963514               | -1.657760 | 0.538623  |
| 9             | 6             | -2.880611               | -2.381438 | -0.791530 |
| 10            | 7             | -2.393797               | -1.545975 | -1.909916 |
| 11            | 6             | -1.985436               | -2.411961 | -3.033440 |
| 12            | 6             | -0.648113               | -3.094367 | -2.812764 |
| 13            | 6             | 2.526207                | -1.160875 | 0.499289  |
| 14            | 6             | 2.944346                | -0.232791 | -0.632189 |
| 15            | 8             | 4.134892                | 0.082173  | -0.707773 |
| 16            | 8             | 2.023331                | 0.214002  | -1.390691 |
| 17            | 6             | -1.805909               | -0.113197 | 2.000032  |
| 18            | 6             | -0.558626               | 0.755548  | 2.145861  |
| 19            | 8             | -0.266555               | 1.206560  | 3.251166  |
| 20            | 8             | 0.088105                | 0.974964  | 1.066105  |
| 21            | 6             | -3.446245               | -0.618287 | -2.345953 |
| 22            | 6             | -3.527027               | 0.679903  | -1.543244 |
| 23            | 8             | -4.580126               | 1.300036  | -1.519557 |
| 24            | 8             | -2.433335               | 1.055620  | -0.989528 |
| 25            | 1             | 3.320568                | -1.890910 | 0.675529  |
| 26            | 1             | 2.483304                | -0.512913 | 1.378525  |
| 27            | 1             | -2.097168               | -0.506559 | 2.976748  |
| 28            | 1             | -2.592781               | 0.559339  | 1.655658  |
| 29            | 1             | -3.236084               | -0.310807 | -3.371607 |
| 30            | 1             | -4.428160               | -1.097990 | -2.354949 |
| 31            | 1             | 2.499873                | -2.296383 | -2.073355 |
| 32            | 1             | 1.762952                | -3.854536 | -2.371214 |
| 33            | 1             | 2.167889                | -3.664811 | -0.035102 |
| 34            | 1             | 0.440740                | -3.644467 | -0.286890 |
| 35            | 1             | 1.072694                | -2.967624 | 2.103672  |
| 36            | 1             | 0.836553                | -1.246988 | 2.299558  |
| 37            | 1             | -1.246678               | -2.542671 | 2.581459  |
| 38            | 1             | -1.088593               | -3.194843 | 0.971132  |
| 39            | 1             | -3.416403               | -2.333555 | 1.271501  |
| 40            | 1             | -3.625997               | -0.799676 | 0.458978  |
| 41            | 1             | -2.218986               | -3.238772 | -0.697740 |
| 42            | 1             | -3.870729               | -2.782768 | -1.032281 |
| 43            | 1             | -1.944711               | -1.801760 | -3.931598 |
| 44            | 1             | -2.738206               | -3.186215 | -3.217065 |
| 45            | 1             | -0.710360               | -3.738351 | -1.939625 |

|    |    |           |           |           |
|----|----|-----------|-----------|-----------|
| 46 | 1  | -0.454831 | -3.756053 | -3.663829 |
| 47 | 64 | -0.319137 | -0.045324 | -1.013353 |
| 48 | 8  | 2.269765  | 2.786467  | 1.152787  |
| 49 | 8  | -0.038735 | 2.382038  | -1.543330 |
| 50 | 1  | 1.521879  | 2.201006  | 0.954682  |
| 51 | 1  | 2.874208  | 2.770968  | 0.397457  |
| 52 | 1  | 0.810606  | 2.716642  | -1.891791 |
| 53 | 1  | -0.478935 | 3.030738  | -0.967383 |
| 54 | 8  | 2.575496  | 1.038614  | 3.349617  |
| 55 | 1  | 2.723704  | 1.651664  | 2.614006  |
| 56 | 1  | 1.612573  | 1.083348  | 3.448372  |
| 57 | 8  | 4.292037  | 2.768744  | -0.876115 |
| 58 | 1  | 5.133958  | 3.143823  | -0.619978 |
| 59 | 1  | 4.398477  | 1.794614  | -0.883708 |
| 60 | 8  | -1.936366 | 3.540361  | 0.022161  |
| 61 | 1  | -2.475582 | 4.231476  | -0.362513 |
| 62 | 1  | -2.330191 | 2.698169  | -0.279089 |
| 63 | 8  | 2.324175  | 2.574249  | -2.811200 |
| 64 | 1  | 2.338626  | 1.647905  | -2.512724 |
| 65 | 1  | 3.059755  | 2.957530  | -2.313064 |
| 66 | 6  | 0.985620  | -1.653058 | -3.901814 |
| 67 | 1  | 1.061790  | -2.443065 | -4.654595 |
| 68 | 1  | 1.989621  | -1.265555 | -3.729882 |
| 69 | 6  | 0.172528  | -0.515999 | -4.420417 |
| 70 | 6  | -0.090476 | -0.143158 | -5.707433 |
| 71 | 1  | 0.130908  | -0.581494 | -6.662215 |
| 72 | 7  | -0.329020 | 0.399083  | -3.523339 |
| 73 | 6  | -0.876621 | 1.333505  | -4.249834 |
| 74 | 16 | -1.696238 | 2.835022  | -4.019479 |
| 75 | 6  | -1.867607 | 2.976547  | -5.716497 |
| 76 | 7  | -0.763101 | 1.048489  | -5.562133 |
| 77 | 7  | -1.323219 | 1.976663  | -6.364553 |
| 78 | 1  | -1.291744 | 1.866355  | -7.370744 |
| 79 | 6  | -2.554127 | 4.095540  | -6.392425 |
| 80 | 1  | -2.290000 | 4.127698  | -7.445934 |
| 81 | 1  | -3.631716 | 3.957901  | -6.296929 |
| 82 | 1  | -2.286040 | 5.037654  | -5.920018 |

---

E(RwB97XD) = -2507.4064232 Hartree

Zero-point correction = 0.676929

Thermal correction to Energy = 0.723829

Thermal correction to Enthalpy = 0.724773

Thermal correction to Gibbs Free Energy = 0.598762

Sum of electronic and zero-point Energies = -2506.729494

Sum of electronic and thermal Energies = -2506.682594

Sum of electronic and thermal Enthalpies = -2506.681650

Sum of electronic and thermal Free Energies = -2506.807661

**Table S2.** Cartesian coordinates (Å) obtained for the GdL3H·6H<sub>2</sub>O system (N<sub>4</sub>O<sub>5</sub> donor set) using DFT calculations (wB97XD functional, 0 imaginary frequencies).

| -----  |        |                         |           |           |  |
|--------|--------|-------------------------|-----------|-----------|--|
| Center | Atomic | Coordinates (Angstroms) |           |           |  |
| Number | Number | X                       | Y         | Z         |  |
| -----  |        |                         |           |           |  |
| 1      | 7      | 0.254479                | -2.240887 | -2.606049 |  |
| 2      | 6      | 1.388733                | -2.950367 | -1.984824 |  |
| 3      | 6      | 1.240518                | -3.138365 | -0.487287 |  |
| 4      | 7      | 1.164908                | -1.884127 | 0.285235  |  |
| 5      | 6      | 0.609249                | -2.158160 | 1.624533  |  |
| 6      | 6      | -0.894811               | -2.349232 | 1.613280  |  |
| 7      | 7      | -1.646811               | -1.191589 | 1.093054  |  |
| 8      | 6      | -3.005953               | -1.615587 | 0.705614  |  |
| 9      | 6      | -3.036512               | -2.334881 | -0.630251 |  |
| 10     | 7      | -2.555319               | -1.522479 | -1.764325 |  |
| 11     | 6      | -2.220219               | -2.395253 | -2.908018 |  |
| 12     | 6      | -0.910450               | -3.137170 | -2.730162 |  |
| 13     | 6      | 2.489516                | -1.265367 | 0.411497  |  |
| 14     | 6      | 2.895601                | -0.373139 | -0.750433 |  |
| 15     | 8      | 4.090922                | -0.091968 | -0.873225 |  |
| 16     | 8      | 1.961035                | 0.082120  | -1.486232 |  |
| 17     | 6      | -1.703662               | -0.116205 | 2.089412  |  |
| 18     | 6      | -0.432168               | 0.725337  | 2.137021  |  |
| 19     | 8      | -0.070156               | 1.204818  | 3.208868  |  |
| 20     | 8      | 0.159382                | 0.897236  | 1.016942  |  |
| 21     | 6      | -3.570830               | -0.536640 | -2.158732 |  |
| 22     | 6      | -3.578305               | 0.745105  | -1.324217 |  |
| 23     | 8      | -4.604016               | 1.408552  | -1.266727 |  |
| 24     | 8      | -2.461764               | 1.061589  | -0.779432 |  |
| 25     | 1      | 3.270716                | -2.010717 | 0.583004  |  |
| 26     | 1      | 2.484308                | -0.597390 | 1.276561  |  |
| 27     | 1      | -1.927519               | -0.499682 | 3.087694  |  |
| 28     | 1      | -2.497907               | 0.574226  | 1.803549  |  |
| 29     | 1      | -3.357048               | -0.208587 | -3.177078 |  |
| 30     | 1      | -4.573701               | -0.971169 | -2.162480 |  |
| 31     | 1      | 2.294094                | -2.387424 | -2.200438 |  |
| 32     | 1      | 1.521178                | -3.938659 | -2.436447 |  |
| 33     | 1      | 2.082956                | -3.743537 | -0.134955 |  |
| 34     | 1      | 0.344324                | -3.718404 | -0.281046 |  |
| 35     | 1      | 1.066784                | -3.054134 | 2.057649  |  |
| 36     | 1      | 0.877811                | -1.331357 | 2.277300  |  |
| 37     | 1      | -1.222455               | -2.581828 | 2.632238  |  |
| 38     | 1      | -1.148322               | -3.215890 | 1.007690  |  |
| 39     | 1      | -3.435362               | -2.278495 | 1.464071  |  |
| 40     | 1      | -3.639848               | -0.733944 | 0.670983  |  |
| 41     | 1      | -2.426539               | -3.232684 | -0.573357 |  |
| 42     | 1      | -4.061159               | -2.671264 | -0.821446 |  |
| 43     | 1      | -2.166409               | -1.770421 | -3.797766 |  |
| 44     | 1      | -3.016990               | -3.125438 | -3.085162 |  |
| 45     | 1      | -0.952737               | -3.754351 | -1.836766 |  |
| 46     | 1      | -0.785192               | -3.825975 | -3.568834 |  |
| 47     | 64     | -0.392768               | -0.102016 | -1.021221 |  |
| 48     | 8      | 2.369433                | 2.693064  | 0.971219  |  |





```

-----
N      -0.35854893 -0.85425002 -2.67584517
C      0.60447863 -1.95778870 -2.82283743
C      0.68330223 -2.87286950 -1.61976936
N      1.12453767 -2.22315749 -0.37534175
C      0.76837357 -3.07500635  0.77708757
C     -0.70597979 -3.00799227  1.12991428
N     -1.17351298 -1.66386425  1.51245762
C     -2.64137287 -1.57992571  1.38893326
C     -3.10694266 -1.43401472 -0.04569334
N     -2.60792994 -0.22183366 -0.72341815
C     -2.75274046 -0.37269805 -2.18647313
C     -1.74772193 -1.32898131 -2.80083293
C      2.56937520 -1.95029182 -0.38932326
C      2.97766999 -0.57392108 -0.91044486
O      4.17755682 -0.30126163 -0.96013972
O      2.04389289  0.23789439 -1.21752499
C     -0.75718616 -1.32311553  2.87921654
C      0.59039373 -0.61601553  2.97301004
O      1.02549858 -0.34870204  4.09910213
O      1.15141876 -0.29279464  1.88499150
C     -3.33458951  0.96939732 -0.26336411
C     -2.73411807  1.68380021  0.94851988
O     -3.39535025  2.60684079  1.43734276
O     -1.56907684  1.34625752  1.31239211
H      3.12082510 -2.71054717 -0.95072773
H      2.94024009 -1.98173744  0.63349793
H     -0.74905539 -2.19985032  3.53336322
H     -1.47414142 -0.61953336  3.29884496
H     -3.31587689  1.71644127 -1.05754415
H     -4.38688510  0.74977075 -0.06379147
H      1.58166297 -1.51939503 -3.01552979
H      0.35980864 -2.57461466 -3.69430791
H      1.35610279 -3.70184957 -1.86828585
H     -0.29127818 -3.32024236 -1.44143493
H      1.02807837 -4.12079617  0.57916357
H      1.36168666 -2.75608620  1.62856755
H     -0.89893217 -3.71924848  1.94065858
H     -1.30036743 -3.34596268  0.28438927
H     -3.12080146 -2.46568447  1.81980374
H     -2.97828512 -0.72602168  1.97032335
H     -2.78987183 -2.30040735 -0.61950776
H     -4.20238962 -1.44351895 -0.05839107
H     -2.62887819  0.61309589 -2.63049135
H     -3.76288458 -0.71328462 -2.43878075
H     -1.81851876 -2.30409820 -2.32634874
H     -2.01605831 -1.48420579 -3.84875075
Gd     -0.03861664  0.20536446 -0.07872764
O      1.25839168  2.26074546  0.74292671
O     -0.58411959  2.20433622 -1.50172769
H      1.35302854  2.25913959  1.71505817
H      2.17175646  2.30180398  0.40720356

```

|   |             |             |              |
|---|-------------|-------------|--------------|
| H | 0.25310883  | 2.54587190  | -1.87533565  |
| H | -0.99138454 | 2.95671756  | -1.02569215  |
| O | 1.63857405  | 2.31107038  | 3.51631060   |
| H | 2.54333644  | 2.56109877  | 3.70364172   |
| H | 1.56220639  | 1.37593787  | 3.78555014   |
| O | 3.91088484  | 2.39460872  | -0.21593668  |
| H | 4.57294316  | 2.64303138  | 0.42885597   |
| H | 4.13548016  | 1.48990557  | -0.50467239  |
| O | -1.80517182 | 4.29938453  | -0.19311891  |
| H | -2.35713202 | 4.81949975  | -0.77799231  |
| H | -2.40724881 | 3.92839372  | 0.47178745   |
| O | 1.96400354  | 2.68289057  | -2.43457290  |
| H | 2.21128104  | 1.81956652  | -2.05461178  |
| H | 2.49963438  | 3.30519124  | -1.93793194  |
| C | -0.05411945 | 0.19996129  | -3.66698555  |
| H | 0.91718731  | 0.61264564  | -3.40866541  |
| H | -0.78147173 | 0.99875262  | -3.55896913  |
| C | -0.01304545 | -0.23546972 | -5.09849446  |
| C | 1.11281102  | -0.54384065 | -5.81849078  |
| H | 2.15905148  | -0.55630002 | -5.57554374  |
| N | -1.15721135 | -0.36099117 | -5.86278784  |
| C | -0.72723860 | -0.74753930 | -7.02463321  |
| S | -1.38049079 | -1.14475072 | -8.58343178  |
| C | 0.19734249  | -1.44690577 | -9.16521573  |
| N | 0.62443940  | -0.87344076 | -7.05391998  |
| N | 1.11428348  | -1.25985082 | -8.24965351  |
| H | 2.11154456  | -1.38097239 | -8.37739264  |
| C | 0.51290242  | -1.86601497 | -10.54648101 |
| H | -0.05702938 | -2.75822902 | -10.79925993 |
| H | 0.23195060  | -1.07280555 | -11.23845533 |
| H | 1.57420812  | -2.07385379 | -10.64992627 |

-----  
E(RwB97XD) = -2507.3869216 Hartree

Zero-point correction = 0.676859

Thermal correction to Energy = 0.723975

Thermal correction to Enthalpy = 0.724919

Thermal correction to Gibbs Free Energy = 0.598028

Sum of electronic and zero-point Energies = -2506.710062

Sum of electronic and thermal Energies = -2506.662946

Sum of electronic and thermal Enthalpies = -2506.662002

Sum of electronic and thermal Free Energies = -2506.788894

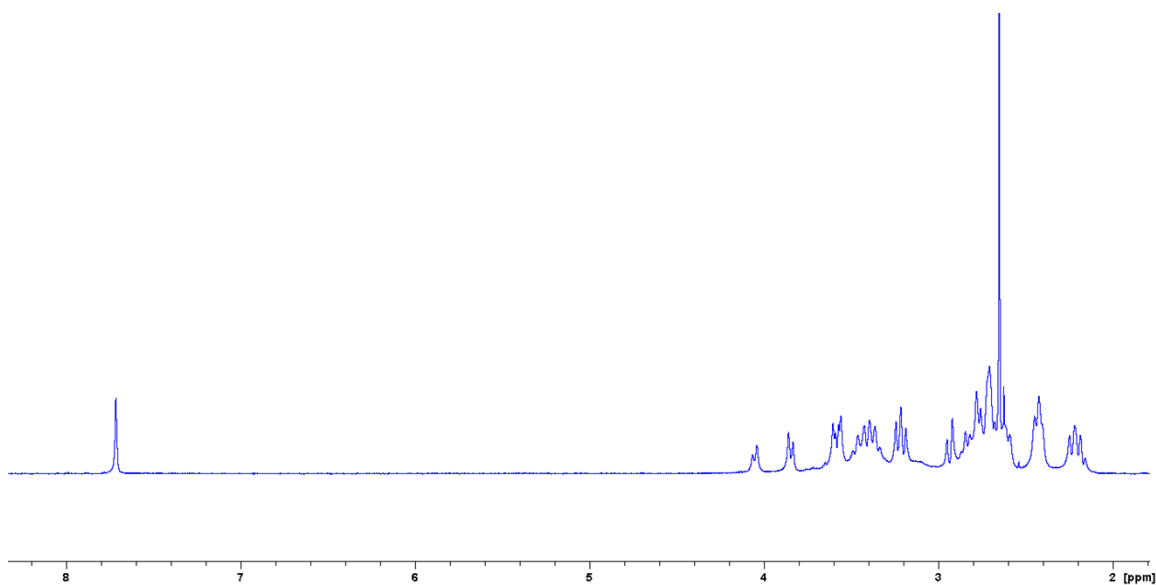

**Figure S18.**  $^1\text{H}$  NMR spectrum (600 MHz) of YL3H 4.6 mM in  $\text{D}_2\text{O}$  at pD 7.36, 298 K.

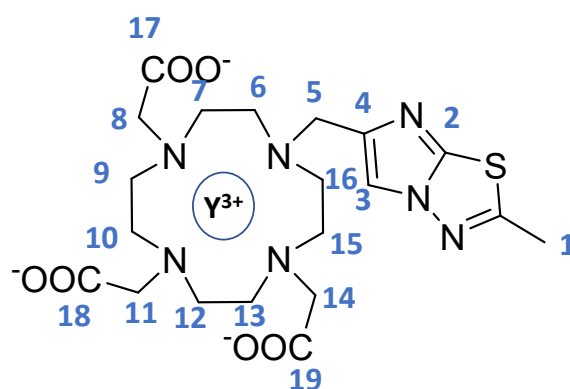

**Figure S19:** Numbering of the C and corresponding H in YL3 used in Table S2 and S3

**Table S4 :**  $^1\text{H}$  NMR (600 MHz) chemical shifts ( $\delta$  ppm) of YL3H in  $\text{D}_2\text{O}$ .

|        | YL3  |
|--------|------|
| H1     | 2.57 |
| H3     | 7.64 |
| H5a    | 3.77 |
| H5b    | 3.98 |
| H6a    | 3.32 |
| H6b    | 2.16 |
| H7a/b  | 2.54 |
| H8a    | 3.49 |
| H8b    | 3.15 |
| H9a    | 2.71 |
| H9b    | 2.77 |
| H10a/b | 3.33 |
| H11a   | 2.86 |

|               |      |
|---------------|------|
| <b>H11b</b>   | 2.62 |
| <b>H12a/b</b> | 2.64 |
| <b>H13a</b>   | 3.38 |
| <b>H13b</b>   | 2.35 |
| <b>H14a</b>   | 3.52 |
| <b>H14b</b>   | 3.12 |
| <b>H15a</b>   | 2.35 |
| <b>H15b</b>   | 2.11 |
| <b>H16a</b>   | 2.68 |
| <b>H16b</b>   | 2.61 |

**Table S5** :  $^{13}\text{C}$  NMR (150 MHz) for YL3H chemical shifts ( $\delta$  ppm) in  $\text{D}_2\text{O}$ .

|            | <b>L3</b> |
|------------|-----------|
| <b>C1</b>  | 164.23    |
| <b>C2</b>  | 146.57    |
| <b>C3</b>  | 109.06    |
| <b>C4</b>  | 143.43    |
| <b>C5</b>  | 59.25     |
| <b>C6</b>  | 55.47     |
| <b>C7</b>  | 55.58     |
| <b>C8</b>  | 65.74     |
| <b>C9</b>  | 56.21     |
| <b>C10</b> | 55.38     |
| <b>C11</b> | 66.10     |
| <b>C12</b> | 55.94     |
| <b>C13</b> | 55.36     |
| <b>C14</b> | 65.82     |
| <b>C15</b> | 57.06     |
| <b>C16</b> | 56.16     |
| <b>C17</b> | 180.72    |
| <b>C18</b> | 180.5     |
| <b>C19</b> | 180.6     |

**Table S6.** Cartesian coordinates ( $\text{\AA}$ ) obtained for the YL3H-6 $\text{H}_2\text{O}$  system ( $\text{N}_5\text{O}_4$  donor set) using DFT calculations (TPSSH functional, 0 imaginary frequencies).

| ----- |        |           |                         |           |   |
|-------|--------|-----------|-------------------------|-----------|---|
|       | Center | Atomic    | Coordinates (Angstroms) |           |   |
|       | Number | Number    | X                       | Y         | Z |
| ----- |        |           |                         |           |   |
| 1     | 7      | 0.410376  | -2.253873               | -2.676440 |   |
| 2     | 6      | 1.534724  | -2.983968               | -2.030675 |   |
| 3     | 6      | 1.327324  | -3.194105               | -0.543237 |   |
| 4     | 7      | 1.220906  | -1.929283               | 0.227831  |   |
| 5     | 6      | 0.650777  | -2.222964               | 1.568500  |   |
| 6     | 6      | -0.850914 | -2.434509               | 1.516238  |   |
| 7     | 7      | -1.589935 | -1.266457               | 0.970938  |   |
| 8     | 6      | -2.946117 | -1.702566               | 0.549927  |   |
| 9     | 6      | -2.919647 | -2.416757               | -0.788833 |   |

|    |    |           |           |           |
|----|----|-----------|-----------|-----------|
| 10 | 7  | -2.405509 | -1.571096 | -1.901207 |
| 11 | 6  | -2.064711 | -2.448986 | -3.051071 |
| 12 | 6  | -0.744633 | -3.172115 | -2.849610 |
| 13 | 6  | 2.550939  | -1.302681 | 0.373483  |
| 14 | 6  | 2.915068  | -0.323303 | -0.735166 |
| 15 | 8  | 4.095847  | 0.058121  | -0.802192 |
| 16 | 8  | 1.963384  | 0.089572  | -1.489105 |
| 17 | 6  | -1.692547 | -0.207286 | 1.996969  |
| 18 | 6  | -0.450356 | 0.677361  | 2.079989  |
| 19 | 8  | -0.194966 | 1.226647  | 3.158991  |
| 20 | 8  | 0.216121  | 0.819703  | 0.987734  |
| 21 | 6  | -3.451170 | -0.603000 | -2.299792 |
| 22 | 6  | -3.457031 | 0.673378  | -1.459140 |
| 23 | 8  | -4.478670 | 1.356285  | -1.402412 |
| 24 | 8  | -2.330308 | 0.969468  | -0.897724 |
| 25 | 1  | 3.343565  | -2.051292 | 0.472552  |
| 26 | 1  | 2.552770  | -0.707368 | 1.288487  |
| 27 | 1  | -1.914366 | -0.625101 | 2.983681  |
| 28 | 1  | -2.514443 | 0.455675  | 1.719232  |
| 29 | 1  | -3.261324 | -0.292198 | -3.329539 |
| 30 | 1  | -4.446543 | -1.057773 | -2.280796 |
| 31 | 1  | 2.442789  | -2.407804 | -2.201835 |
| 32 | 1  | 1.681662  | -3.962267 | -2.504729 |
| 33 | 1  | 2.161525  | -3.794389 | -0.158986 |
| 34 | 1  | 0.421514  | -3.773235 | -0.367919 |
| 35 | 1  | 1.118010  | -3.115270 | 2.002894  |
| 36 | 1  | 0.892079  | -1.387631 | 2.223372  |
| 37 | 1  | -1.212176 | -2.665664 | 2.525799  |
| 38 | 1  | -1.084841 | -3.299238 | 0.896497  |
| 39 | 1  | -3.387475 | -2.372472 | 1.297755  |
| 40 | 1  | -3.581916 | -0.820514 | 0.500461  |
| 41 | 1  | -2.291987 | -3.304386 | -0.723028 |
| 42 | 1  | -3.931892 | -2.764463 | -1.028170 |
| 43 | 1  | -2.023117 | -1.829102 | -3.945110 |
| 44 | 1  | -2.852551 | -3.194212 | -3.215819 |
| 45 | 1  | -0.800704 | -3.807309 | -1.966860 |
| 46 | 1  | -0.571139 | -3.838976 | -3.702904 |
| 47 | 39 | -0.307612 | -0.160083 | -1.037752 |
| 48 | 8  | 2.111167  | 3.114378  | 1.092575  |
| 49 | 8  | -0.021952 | 2.228518  | -1.554091 |
| 50 | 1  | 1.529547  | 2.339963  | 0.971729  |
| 51 | 1  | 2.880901  | 2.974629  | 0.507178  |
| 52 | 1  | 0.859708  | 2.567350  | -1.846846 |
| 53 | 1  | -0.452907 | 2.866679  | -0.942654 |
| 54 | 8  | 2.225944  | 2.490846  | 3.831046  |
| 55 | 1  | 2.402099  | 2.827370  | 2.930801  |
| 56 | 1  | 1.376020  | 2.027615  | 3.688545  |
| 57 | 8  | 4.299414  | 2.740693  | -0.682539 |
| 58 | 1  | 5.186066  | 3.081760  | -0.520815 |
| 59 | 1  | 4.378003  | 1.757227  | -0.757884 |
| 60 | 8  | -1.823443 | 3.483842  | 0.058940  |
| 61 | 1  | -2.340854 | 4.178248  | -0.365356 |

|    |    |           |           |           |
|----|----|-----------|-----------|-----------|
| 62 | 1  | -2.248075 | 2.636954  | -0.213921 |
| 63 | 8  | 2.390361  | 2.562484  | -2.702020 |
| 64 | 1  | 2.401429  | 1.606446  | -2.480978 |
| 65 | 1  | 3.110679  | 2.913218  | -2.144151 |
| 66 | 6  | 0.878164  | -1.756215 | -3.992525 |
| 67 | 1  | 0.864960  | -2.549073 | -4.748109 |
| 68 | 1  | 1.915054  | -1.438155 | -3.868272 |
| 69 | 6  | 0.108504  | -0.567542 | -4.461498 |
| 70 | 6  | -0.122628 | -0.128594 | -5.742525 |
| 71 | 1  | 0.081466  | -0.536477 | -6.715708 |
| 72 | 7  | -0.346918 | 0.338611  | -3.521455 |
| 73 | 6  | -0.829615 | 1.342911  | -4.218540 |
| 74 | 16 | -1.535615 | 2.896036  | -3.941024 |
| 75 | 6  | -1.700319 | 3.114359  | -5.636830 |
| 76 | 7  | -0.724858 | 1.098353  | -5.552660 |
| 77 | 7  | -1.217817 | 2.096277  | -6.323551 |
| 78 | 1  | -1.182411 | 2.022088  | -7.336067 |
| 79 | 6  | -2.308652 | 4.303370  | -6.277781 |
| 80 | 1  | -2.044844 | 4.344500  | -7.332975 |
| 81 | 1  | -3.395428 | 4.245357  | -6.181684 |
| 82 | 1  | -1.969225 | 5.210662  | -5.779694 |

-----  
E(RTPSSh) = -2510.3196644 Hartree

Zero-point correction = 0.664392

Thermal correction to Energy = 0.711818

Thermal correction to Enthalpy = 0.712762

Thermal correction to Gibbs Free Energy = 0.586315

Sum of electronic and zero-point Energies = -2509.655272

Sum of electronic and thermal Energies = -2509.607847

Sum of electronic and thermal Enthalpies = -2509.606903

Sum of electronic and thermal Free Energies = -2509.733350

**Table S7.** Cartesian coordinates (Å) obtained for the YL3H-6H<sub>2</sub>O system (N<sub>4</sub>O<sub>4</sub> donor set) using DFT calculations (TPSSh functional, 0 imaginary frequencies).

| Center Number | Atomic Number | Coordinates (Angstroms) |           |           |
|---------------|---------------|-------------------------|-----------|-----------|
|               |               | X                       | Y         | Z         |
| 1             | 7             | 0.675860                | -2.258612 | -2.449153 |
| 2             | 6             | 1.776979                | -2.950160 | -1.731551 |
| 3             | 6             | 1.470033                | -3.187433 | -0.262684 |
| 4             | 7             | 1.265531                | -1.940536 | 0.518178  |
| 5             | 6             | 0.590671                | -2.268135 | 1.801557  |
| 6             | 6             | -0.893995               | -2.514472 | 1.615242  |
| 7             | 7             | -1.601513               | -1.349405 | 1.026004  |
| 8             | 6             | -2.922218               | -1.793602 | 0.506137  |
| 9             | 6             | -2.796889               | -2.489249 | -0.837624 |
| 10            | 7             | -2.199876               | -1.628758 | -1.892782 |
| 11            | 6             | -1.744382               | -2.481671 | -3.025424 |
| 12            | 6             | -0.439915               | -3.201811 | -2.728839 |

|    |    |           |           |           |
|----|----|-----------|-----------|-----------|
| 13 | 6  | 2.559851  | -1.279702 | 0.788172  |
| 14 | 6  | 2.981297  | -0.275071 | -0.274422 |
| 15 | 8  | 4.132224  | 0.187372  | -0.214964 |
| 16 | 8  | 2.093732  | 0.067478  | -1.134818 |
| 17 | 6  | -1.781205 | -0.290276 | 2.043844  |
| 18 | 6  | -0.597616 | 0.669128  | 2.159368  |
| 19 | 8  | -0.445881 | 1.279914  | 3.222711  |
| 20 | 8  | 0.132595  | 0.808211  | 1.104841  |
| 21 | 6  | -3.200439 | -0.648240 | -2.371462 |
| 22 | 6  | -3.274208 | 0.621401  | -1.524669 |
| 23 | 8  | -4.267043 | 1.343867  | -1.611507 |
| 24 | 8  | -2.232329 | 0.876467  | -0.802882 |
| 25 | 1  | 3.362995  | -2.008145 | 0.939890  |
| 26 | 1  | 2.468939  | -0.703827 | 1.710614  |
| 27 | 1  | -2.006361 | -0.713822 | 3.026931  |
| 28 | 1  | -2.628282 | 0.328418  | 1.742474  |
| 29 | 1  | -2.908739 | -0.321277 | -3.372338 |
| 30 | 1  | -4.195240 | -1.097207 | -2.452454 |
| 31 | 1  | 2.671988  | -2.337767 | -1.834836 |
| 32 | 1  | 1.994825  | -3.918245 | -2.196919 |
| 33 | 1  | 2.291398  | -3.768316 | 0.174639  |
| 34 | 1  | 0.571780  | -3.796035 | -0.164763 |
| 35 | 1  | 1.044267  | -3.151642 | 2.266456  |
| 36 | 1  | 0.749404  | -1.433194 | 2.482704  |
| 37 | 1  | -1.337758 | -2.770305 | 2.585029  |
| 38 | 1  | -1.054551 | -3.371626 | 0.962354  |
| 39 | 1  | -3.405311 | -2.477400 | 1.214006  |
| 40 | 1  | -3.560570 | -0.916675 | 0.422261  |
| 41 | 1  | -2.177605 | -3.379966 | -0.740330 |
| 42 | 1  | -3.789559 | -2.829971 | -1.156336 |
| 43 | 1  | -1.623324 | -1.833972 | -3.893882 |
| 44 | 1  | -2.510126 | -3.222448 | -3.284114 |
| 45 | 1  | -0.553375 | -3.848564 | -1.859528 |
| 46 | 1  | -0.194508 | -3.852106 | -3.573505 |
| 47 | 39 | -0.206117 | -0.260428 | -0.875398 |
| 48 | 8  | 1.782403  | 3.286943  | 1.078553  |
| 49 | 8  | 0.083301  | 1.851780  | -1.918361 |
| 50 | 1  | 1.282513  | 2.452440  | 1.009376  |
| 51 | 1  | 2.607776  | 3.150178  | 0.571901  |
| 52 | 1  | 0.965974  | 2.200515  | -2.195104 |
| 53 | 1  | -0.491890 | 2.603407  | -1.641075 |
| 54 | 8  | 1.735031  | 2.941066  | 3.872596  |
| 55 | 1  | 1.936461  | 3.207094  | 2.954199  |
| 56 | 1  | 0.969953  | 2.347982  | 3.731760  |
| 57 | 8  | 4.133218  | 2.880980  | -0.448767 |
| 58 | 1  | 4.966483  | 3.298203  | -0.202827 |
| 59 | 1  | 4.274117  | 1.903135  | -0.382181 |
| 60 | 8  | -1.738519 | 3.558204  | -0.838818 |
| 61 | 1  | -2.337530 | 4.034903  | -1.425427 |
| 62 | 1  | -2.167433 | 2.684857  | -0.686080 |
| 63 | 8  | 2.626271  | 2.266084  | -2.729493 |
| 64 | 1  | 2.656169  | 1.385907  | -2.295740 |



|    |    |          |           |           |
|----|----|----------|-----------|-----------|
| 65 | 1  | 3.183860 | 2.799701  | -2.133255 |
| 66 | 6  | 1.202401 | -1.646246 | -3.707903 |
| 67 | 1  | 1.894408 | -0.860889 | -3.408271 |
| 68 | 1  | 0.369184 | -1.174692 | -4.228853 |
| 69 | 6  | 1.909283 | -2.570156 | -4.654865 |
| 70 | 6  | 3.275599 | -2.681497 | -4.814313 |
| 71 | 1  | 4.116275 | -2.196666 | -4.351077 |
| 72 | 7  | 1.218901 | -3.412637 | -5.515256 |
| 73 | 6  | 2.155346 | -4.032147 | -6.179911 |
| 74 | 16 | 2.285329 | -5.223732 | -7.437879 |
| 75 | 6  | 3.994607 | -5.110155 | -7.379823 |
| 76 | 7  | 3.408362 | -3.629853 | -5.799045 |
| 77 | 7  | 4.408056 | -4.237261 | -6.480643 |
| 78 | 1  | 5.377027 | -4.008104 | -6.278189 |
| 79 | 6  | 4.918906 | -5.904597 | -8.223190 |
| 80 | 1  | 5.942913 | -5.559460 | -8.095557 |
| 81 | 1  | 4.855808 | -6.956920 | -7.939154 |
| 82 | 1  | 4.632657 | -5.816076 | -9.271343 |

-----  
E(RTPSSh) = -2510.3196813 Hartree

Zero-point correction = 0.663653

Thermal correction to Energy = 0.711310

Thermal correction to Enthalpy = 0.712254

Thermal correction to Gibbs Free Energy = 0.583399

Sum of electronic and zero-point Energies = -2509.656029

Sum of electronic and thermal Energies = -2509.608371

Sum of electronic and thermal Enthalpies = -2509.607427

Sum of electronic and thermal Free Energies = -2509.736282

**Table S8.** Cartesian coordinates (Å) obtained for the YL3H-6H<sub>2</sub>O system (N<sub>5</sub>O<sub>5</sub> donor set) using DFT calculations (TPSSh functional, 0 imaginary frequencies).

| -----  |        |                         |           |           |  |
|--------|--------|-------------------------|-----------|-----------|--|
| Center | Atomic | Coordinates (Angstroms) |           |           |  |
| Number | Number | X                       | Y         | Z         |  |
| -----  |        |                         |           |           |  |
| 1      | 7      | -0.323384               | -0.843948 | -2.676827 |  |
| 2      | 6      | 0.665826                | -1.937794 | -2.804515 |  |
| 3      | 6      | 0.725420                | -2.849229 | -1.593861 |  |
| 4      | 7      | 1.122079                | -2.173717 | -0.335065 |  |
| 5      | 6      | 0.769480                | -3.053828 | 0.811084  |  |
| 6      | 6      | -0.714686               | -3.009607 | 1.134959  |  |
| 7      | 7      | -1.196156               | -1.656202 | 1.504665  |  |
| 8      | 6      | -2.672900               | -1.589641 | 1.368610  |  |
| 9      | 6      | -3.106958               | -1.454256 | -0.077992 |  |
| 10     | 7      | -2.578032               | -0.234460 | -0.740694 |  |
| 11     | 6      | -2.723435               | -0.384029 | -2.214975 |  |
| 12     | 6      | -1.711195               | -1.343961 | -2.818026 |  |
| 13     | 6      | 2.573700                | -1.882036 | -0.325783 |  |
| 14     | 6      | 2.945714                | -0.493475 | -0.839813 |  |

|    |    |           |           |           |
|----|----|-----------|-----------|-----------|
| 15 | 8  | 4.145208  | -0.183210 | -0.897917 |
| 16 | 8  | 1.977676  | 0.296198  | -1.138733 |
| 17 | 6  | -0.804168 | -1.323991 | 2.891353  |
| 18 | 6  | 0.539267  | -0.610781 | 2.983506  |
| 19 | 8  | 0.993695  | -0.347676 | 4.112686  |
| 20 | 8  | 1.089001  | -0.279169 | 1.881857  |
| 21 | 6  | -3.329465 | 0.957441  | -0.285314 |
| 22 | 6  | -2.708350 | 1.685710  | 0.907531  |
| 23 | 8  | -3.339135 | 2.649953  | 1.378877  |
| 24 | 8  | -1.552196 | 1.304743  | 1.289344  |
| 25 | 1  | 3.140123  | -2.632878 | -0.888228 |
| 26 | 1  | 2.927767  | -1.918856 | 0.704646  |
| 27 | 1  | -0.795608 | -2.211325 | 3.534102  |
| 28 | 1  | -1.539382 | -0.633123 | 3.305275  |
| 29 | 1  | -3.349725 | 1.686010  | -1.097807 |
| 30 | 1  | -4.371893 | 0.711164  | -0.056769 |
| 31 | 1  | 1.639379  | -1.475658 | -2.969081 |
| 32 | 1  | 0.453358  | -2.559954 | -3.682998 |
| 33 | 1  | 1.428550  | -3.663410 | -1.813672 |
| 34 | 1  | -0.244901 | -3.317190 | -1.432839 |
| 35 | 1  | 1.051477  | -4.093190 | 0.600600  |
| 36 | 1  | 1.349718  | -2.728458 | 1.671352  |
| 37 | 1  | -0.917735 | -3.716659 | 1.949375  |
| 38 | 1  | -1.293897 | -3.350600 | 0.277298  |
| 39 | 1  | -3.147820 | -2.480506 | 1.798524  |
| 40 | 1  | -3.017780 | -0.731693 | 1.943181  |
| 41 | 1  | -2.774337 | -2.320536 | -0.647658 |
| 42 | 1  | -4.203493 | -1.453144 | -0.121263 |
| 43 | 1  | -2.596501 | 0.605381  | -2.653724 |
| 44 | 1  | -3.735263 | -0.725831 | -2.466387 |
| 45 | 1  | -1.773013 | -2.318196 | -2.335226 |
| 46 | 1  | -1.965793 | -1.504619 | -3.870546 |
| 47 | 39 | -0.056123 | 0.192450  | -0.036501 |
| 48 | 8  | 1.220106  | 2.227760  | 0.816632  |
| 49 | 8  | -0.538888 | 2.132758  | -1.432005 |
| 50 | 1  | 1.359217  | 2.187924  | 1.790448  |
| 51 | 1  | 2.128686  | 2.300687  | 0.453082  |
| 52 | 1  | 0.300027  | 2.480198  | -1.823316 |
| 53 | 1  | -0.946465 | 2.910182  | -0.977440 |
| 54 | 8  | 1.751611  | 2.245471  | 3.591392  |
| 55 | 1  | 2.692841  | 2.413747  | 3.714528  |
| 56 | 1  | 1.621048  | 1.299138  | 3.842487  |
| 57 | 8  | 3.884711  | 2.484261  | -0.185399 |
| 58 | 1  | 4.534380  | 2.725963  | 0.484451  |
| 59 | 1  | 4.114606  | 1.566301  | -0.465024 |
| 60 | 8  | -1.734408 | 4.317233  | -0.219817 |
| 61 | 1  | -2.275613 | 4.819511  | -0.840527 |
| 62 | 1  | -2.366612 | 3.942413  | 0.428473  |
| 63 | 8  | 1.951382  | 2.706452  | -2.439872 |
| 64 | 1  | 2.198518  | 1.849881  | -2.023484 |
| 65 | 1  | 2.480361  | 3.349562  | -1.949520 |
| 66 | 6  | -0.027439 | 0.197918  | -3.702784 |

|    |    |           |           |            |
|----|----|-----------|-----------|------------|
| 67 | 1  | 0.951697  | 0.606356  | -3.464052  |
| 68 | 1  | -0.757069 | 0.996965  | -3.594596  |
| 69 | 6  | -0.015349 | -0.257797 | -5.134425  |
| 70 | 6  | 1.096944  | -0.587793 | -5.882356  |
| 71 | 1  | 2.150351  | -0.618552 | -5.669179  |
| 72 | 7  | -1.183196 | -0.356461 | -5.880724  |
| 73 | 6  | -0.782926 | -0.748747 | -7.058975  |
| 74 | 16 | -1.473419 | -1.126639 | -8.608986  |
| 75 | 6  | 0.088077  | -1.460943 | -9.232202  |
| 76 | 7  | 0.577018  | -0.902541 | -7.114668  |
| 77 | 7  | 1.033317  | -1.295710 | -8.327006  |
| 78 | 1  | 2.028252  | -1.438094 | -8.476679  |
| 79 | 6  | 0.372761  | -1.880422 | -10.624407 |
| 80 | 1  | -0.230489 | -2.751839 | -10.880176 |
| 81 | 1  | 0.114243  | -1.071780 | -11.310487 |
| 82 | 1  | 1.427584  | -2.123691 | -10.735842 |

-----  
E(RTPSSh) = -2510.3156777 Hartree

Zero-point correction = 0.663423

Thermal correction to Energy = 0.711209

Thermal correction to Enthalpy = 0.712153

Thermal correction to Gibbs Free Energy = 0.584550

Sum of electronic and zero-point Energies = -2509.652254

Sum of electronic and thermal Energies = -2509.604468

Sum of electronic and thermal Enthalpies = -2509.603524

Sum of electronic and thermal Free Energies = -2509.731128

**Table S9.** Tb<sup>III</sup>-centered luminescence lifetimes of 0.5 mM solutions of TbL3H.<sup>a</sup>

| Solvent          | $\tau_{\text{obs}}$ (ms)                                        |
|------------------|-----------------------------------------------------------------|
| HEPES, pH 7.4    | 1.5(1): 94(2)%<br>0.44(1): 6(2)%<br>$\tau_{\text{av}} = 1.5(1)$ |
| D <sub>2</sub> O | 2.6(1): 92(2)%<br>0.83(2): 8(2)%<br>$\tau_{\text{av}} = 2.4(1)$ |

<sup>a</sup>  $2\sigma$  values are given between parentheses. Experimental error:  $\pm 5\%$ . Under excitation at 266 nm.

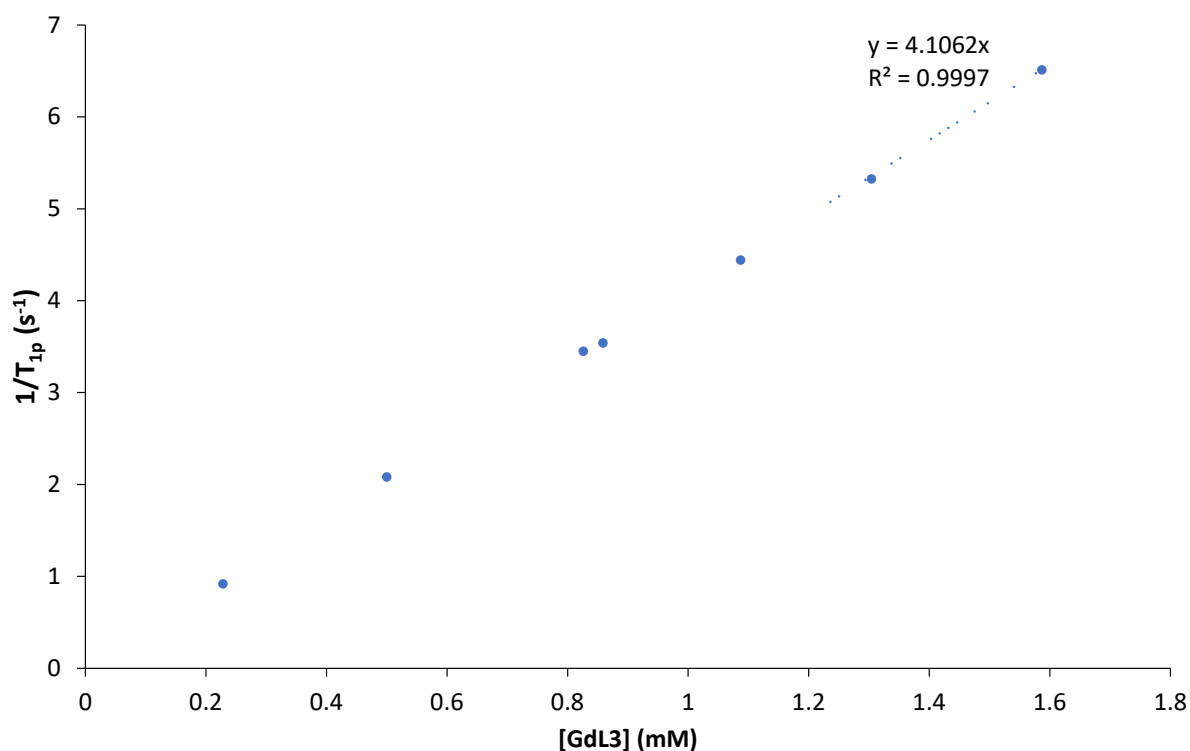**Figure S20.** Paramagnetic Relaxation Enhancement measurements in the presence of GdL3H at 60 MHz, 25°C.**Table S10.** Parameters obtained from the simultaneous fitting of the transverse <sup>17</sup>O NMR relaxation rates and chemical shifts as a function of temperature at 9.4 T, and of the NMRD profiles at 298 K, 310 K, and 323 K, using the Solomon Bloembergen and Morgan theory presented below.

|                                             | GdL3    |
|---------------------------------------------|---------|
| $k_{ex}^{298}$ ( $10^6 s^{-1}$ )            | 4.8 (6) |
| $\Delta H^\ddagger$ (kJ.mol <sup>-1</sup> ) | 27 (4)  |
| $\tau_R^{298}$ (ps) <sup>[a],[b]</sup>      | 75 (2)  |
| $E_R$ (kJ.mol <sup>-1</sup> )               | 19 (3)  |

|                                                                   |          |
|-------------------------------------------------------------------|----------|
| $\tau_v^{298}$ (ps)                                               | 14 (2)   |
| $\Delta^2$ ( $10^{20}\text{s}^{-1}$ )                             | 0.83 (6) |
| $D_{GdH}^{298}$ ( $10^{-9}\text{m}^2\text{s}^{-1}$ ) <sup>a</sup> | 26       |
| $E_{DGdH}$ ( $\text{kJ}\cdot\text{mol}^{-1}$ )                    | 22 (3)   |

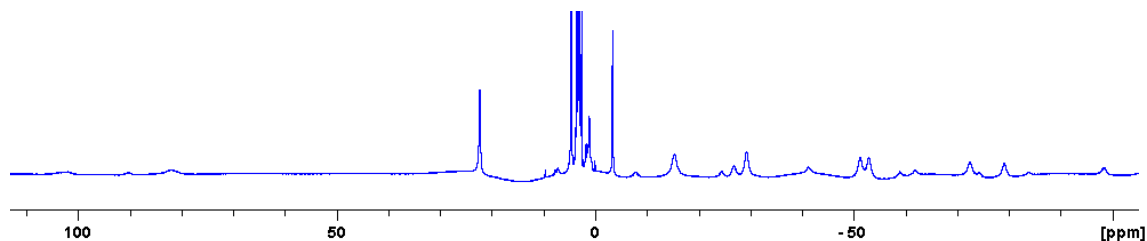

**Figure S21.**  $^1\text{H}$  NMR spectra (700 MHz) of TbL3H 1.5 mM in D<sub>2</sub>O at pH 7.0, 298K.

### Equations used for the analysis of the $^{17}\text{O}$ NMR and NMRD data

#### $^{17}\text{O}$ NMR spectroscopy

From the measured  $^{17}\text{O}$  NMR relaxation rates and angular frequencies of the paramagnetic solutions,  $1/T_2$ ,  $1/T_1$  and  $\omega$ , and from the acidified water reference,  $1/T_{2A}$ ,  $1/T_{1A}$  and  $\omega_A$ , it is possible to calculate the reduced relaxation rates and chemical shifts,  $1/T_{2r}$ ,  $1/T_{1r}$  and  $\Delta\omega_r$  (Eq. 1-3), where  $1/T_{1m}$  and  $1/T_{2m}$  are the relaxation rate of the bound water and  $\Delta\omega_m$  is the chemical shift difference between bound and bulk water,  $\tau_m$  is the mean residence time or the inverse of the water exchange rate  $k_{ex}$  and  $P_m$  is the mole fraction of the bound water.<sup>[1]</sup>

$$\frac{1}{T_{1r}} = \frac{1}{P_m} \left[ \frac{1}{T_1} - \frac{1}{T_{1A}} \right] = \frac{1}{T_{1m} + \tau_m} + \frac{1}{T_{1os}} \quad [1]$$

$$\frac{1}{T_{2r}} = \frac{1}{P_m} \left[ \frac{1}{T_2} - \frac{1}{T_{2A}} \right] = \frac{1}{\tau_m} \frac{T_{2m}^{-2} + \tau_m^{-1} T_{2m}^{-1} + \Delta\omega_m^2}{(\tau_m^{-1} + T_{2m}^{-1})^2 + \Delta\omega_m^2} + \frac{1}{T_{2os}} \quad [2]$$

$$\Delta\omega_r = \frac{1}{P_m} (\omega - \omega_A) = \frac{\Delta\omega_m}{(1 + \tau_m T_{2m}^{-1})^2 + \tau_m^2 \Delta\omega_m^2} + \Delta\omega_{os} \quad [3]$$

The outer sphere contributions to the  $^{17}\text{O}$  relaxation rates  $1/T_{1os}$  and  $1/T_{2os}$  can be neglected according to previous studies.<sup>[2]</sup> Eqs. 1-2 can be further simplified into Eqs. 4-5:

$$\frac{1}{T_{1r}} = \frac{1}{T_{1m} + \tau_m} \quad [4]$$

$$\frac{1}{T_{2r}} = \frac{1}{T_{2m} + \tau_m} \quad [5]$$

The exchange rate is assumed to be described by the Eyring equation (Eq 6), where  $\Delta S^\ddagger$  and  $\Delta H^\ddagger$  are the entropy and enthalpy of activation for the water exchange process, and  $k_{ex}^{298}$  is the exchange rate at 298.15 K. R is the usual gas constant whereas h and  $k_B$  are the Planck and Boltzmann constants, respectively:

$$\frac{1}{\tau_m} = k_{ex} = \frac{k_B T}{h} \exp\left\{\frac{\Delta S^\ddagger}{R} - \frac{\Delta H^\ddagger}{RT}\right\} = \frac{k_{ex}^{298} T}{298.15} \exp\left\{\frac{\Delta H^\ddagger}{R} \left(\frac{1}{298.15} - \frac{1}{T}\right)\right\} \quad [6]$$

In the transverse relaxation the scalar contribution,  $1/T_{2sc}$ , is the most important. In Eq. 7  $1/\tau_{s1}$  is the sum of the exchange rate and the electron spin relaxation rate constants.

$$\frac{1}{T_{2m}} \cong \frac{1}{T_{2sc}} = \frac{S(S+1)}{3} \left(\frac{A}{h}\right)^2 \left(\tau_{s1} + \frac{\tau_{s2}}{1 + \omega_S^2 \tau_{s2}^2}\right) \quad [7]$$

$$\frac{1}{\tau_{s1}} = \frac{1}{\tau_m} + \frac{1}{T_{1e}} \quad [8]$$

The  $^{17}\text{O}$  longitudinal relaxation rates in  $\text{Gd}^{3+}$  solutions are the sum of the contributions of the dipole-dipole ( $dd$ ) and quadrupolar ( $q$ ) mechanisms as expressed by Equations (11-13) for non-extreme narrowing conditions, where  $\gamma_S$  is the electron and  $\gamma_I$  is the nuclear gyromagnetic ratio ( $\gamma_S = 1.76 \times 10^{11} \text{ rad s}^{-1} \text{ T}^{-1}$ ,  $\gamma_I = -3.626 \times 10^7 \text{ rad s}^{-1} \text{ T}^{-1}$ ),  $r_{\text{GdO}}$  is the effective distance between the electron charge and the  $^{17}\text{O}$  nucleus,  $I$  is the nuclear spin (5/2 for  $^{17}\text{O}$ ),  $\chi$  is the quadrupolar coupling constant and  $\eta$  is an asymmetry parameter :

$$\frac{1}{T_{1m}} = \frac{1}{T_{1dd}} + \frac{1}{T_{1q}} \quad [9]$$

with:

$$\frac{1}{T_{1dd}} = \frac{2}{15} \left( \frac{\mu_0}{4\pi} \right)^2 \frac{\hbar^2 \gamma_I^2 \gamma_S^2}{r_{\text{GdO}}^6} S(S+1) \times [3J(\omega_I; \tau_{d1}) + 7J(\omega_S; \tau_{d2})] \quad [10]$$

$$\frac{1}{T_{1q}} = \frac{3\pi^2}{10} \frac{2I+3}{I^2(2I-1)} \chi^2 (1 + \eta^2/3) \times [0.2J_1(\omega_I) + 0.8J_2(\omega_I)] \quad [11]$$

In Eq. 3, the chemical shift of the bound water molecule,  $\Delta\omega_m$ , depends on the hyperfine interaction between the  $\text{Gd}^{3+}$  electron spin and the  $^{17}\text{O}$  nucleus and is directly proportional to the scalar coupling constant,  $A\hbar$ , as expressed in Eq. 7.<sup>[3]</sup>

$$\Delta\omega_m = \frac{g_L \mu_B S(S+1) B A}{3k_B T \hbar} \quad [12]$$

The isotopic Landé g factor is equal to 2.0 for the Gd<sup>3+</sup>, B represents the magnetic field, and  $k_B$  is the Boltzmann constant.

## <sup>1</sup>H NMRD

The measured longitudinal proton relaxation rate,  $R_1^{obs}$  is the sum of the paramagnetic and diamagnetic contributions as expressed in Eq. 13, where  $r_1$  is the proton relaxivity:

$$R_1^{obs} = R_1^d + R_1^p = R_1^d + r_1 \times c_{Gd} \quad [13]$$

The relaxivity can be divided into terms of inner and outer sphere, as follows:

$$r_1 = r_{1is} + r_{1os} \quad [14]$$

The inner sphere term is obtained in Eq. 15, where  $q$  is the number of inner sphere water molecules.<sup>[4]</sup>

$$r_{1is} = \frac{1}{1000} \times \frac{q}{55.55} \times \frac{1}{T_{1m}^H + \tau_m} \quad [15]$$

The longitudinal relaxation rate of inner sphere protons,  $1/T_{1m}^H$  is expressed by Eq. 16, where  $r_{GdH}$  is the effective distance between the electron charge and the <sup>1</sup>H nucleus,  $\omega_I$  is the proton resonance frequency and  $\omega_S$  is the Larmor frequency of the Gd<sup>III</sup> electron spin.

$$\frac{1}{T_{1m}^H} = \frac{2}{15} \left( \frac{\mu_0}{4\pi} \right)^2 \frac{\hbar^2 \gamma_I^2 \gamma_S^2}{r_{GdH}^6} S(S+1) \times [3J(\omega_I; \tau_{d1}) + 7J(\omega_S; \tau_{d2})] \quad [16]$$



$$\frac{1}{\tau_{di}} = \frac{1}{\tau_m} + \frac{1}{\tau} + \frac{1}{T_{ie}} \quad [17]$$

The longitudinal and transverse electronic relaxation rates,  $1/T_{1e}$  and  $1/T_{2e}$  are expressed by Eq. 18-19, where  $\tau_v$  is the electronic correlation time for the modulation of the zero-field-splitting interaction,  $E_v$  the corresponding activation energy and  $\Delta^2$  is the mean square zero-field-splitting energy. We assumed a simple exponential dependence of  $\tau_v$  versus  $1/T$ .

$$\left(\frac{1}{T_{1e}}\right)^{ZFS} = \frac{1}{25} \Delta^2 \tau_v \{4S(S+1) - 3\} \left\{ \frac{1}{1 + \omega_S^2 \tau_v^2} + \frac{4}{1 + 4\omega_S^2 \tau_v^2} \right\} \quad [18]$$

$$\left(\frac{1}{T_{2e}}\right)^{ZFS} = \Delta^2 \tau_v \left( \frac{5.26}{1 + 0.372\omega_S^2 \tau_v^2} + \frac{7.18}{1 + 1.24\omega_S \tau_v} \right) \quad [19]$$

$$\tau_v = \tau_v^{298} \exp\left\{ \frac{E_v}{R} \left( \frac{1}{T} - \frac{1}{298.15} \right) \right\} \quad [20]$$

The outer-sphere contribution can be described by Eq. 17 where  $N_A$  is the Avogadro constant, and  $J_{os}$  is its associated spectral density function.<sup>[5],[6]</sup>

$$r_{1os} = \frac{32N_A \pi}{405} \left( \frac{\mu_0}{4\pi} \right)^2 \frac{\hbar^2 \gamma_S^2 \gamma_I^2}{a_{GdH} D_{GdH}} S(S+1) [3J_{os}(\omega_I, T_{1e}) + 7J_{os}(\omega_S, T_{2e})] \quad [21]$$

$$J_{os}(\omega, T_{je}) = \text{Re} \left[ \frac{1 + \frac{1}{4} \left( i\omega\tau_{GdH} + \frac{\tau_{GdH}}{T_{je}} \right)^{1/2}}{1 + \left( i\omega\tau_{GdH} + \frac{\tau_{GdH}}{T_{je}} \right)^{1/2} + \frac{4}{9} \left( i\omega\tau_{GdH} + \frac{\tau_{GdH}}{T_{je}} \right) + \frac{1}{9} \left( i\omega\tau_{GdH} + \frac{\tau_{GdH}}{T_{je}} \right)^{3/2}} \right] \quad j = 1, 2 \quad [22]$$

The diffusion coefficient for the diffusion of a water proton away from a Gd<sup>III</sup> complex,  $D_{GdH}$ , is assumed to obey an exponential law versus the inverse of the temperature, with an activation energy  $E_{GdH}$ , as given in Eq. 23  $D_{GdH}^{298}$  is the diffusion coefficient at 298.15 K.

$$D_{GdH} = D_{GdH}^{298} \exp\left\{\frac{E_{GdH}}{R}\left(\frac{1}{298.15} - \frac{1}{T}\right)\right\} \quad [23]$$

- [1] T. J. Swift, R. E. Connick, *J. Chem. Phys.* **1962**, *37*, 307-&.
- [2] K. Micskei, L. Helm, E. Brucher, A. E. Merbach, *Inorg. Chem.* **1993**, *32*, 3844-3850.
- [3] H. G. Brittain, J. F. Desreux, *Inorg. Chem.* **1984**, *23*, 4459-4466.
- [4] Z. Luz, S. Meiboom, *J. Chem. Phys.* **1964**, *40*, 2686-&.
- [5] J. H. Freed, *J. Chem. Phys.* **1978**, *68*, 4034-4037.
- [6] S. H. Koenig, R. D. Brown Iii, *Prog. Nucl. Magn. Reson. Spectrosc.* **1990**, *22*, 487-567.
